1 **Phase II/III Double-Blind Study Evaluating Safety and Immunogenicity of a**  
2 **Single Intramuscular Booster Dose of the Recombinant SARS-CoV-2 Vaccine**  
3 **"Patria" (AVX/COVID-12) Using an Active Newcastle Disease Viral Vector**  
4 **(NDV) during the Omicron Outbreak in Healthy Adults with Elevated Baseline**  
5 **Antibody Titers from Prior COVID-19 and/or SARS-CoV-2 Vaccination**

6 Constantino López-Macías<sup>1\*</sup>, Martha Torres<sup>2</sup>, Brenda Armenta-Copca<sup>3</sup>, Niels H.  
7 Wachter<sup>4</sup>, Arturo Galindo-Fraga<sup>5</sup>, Laura Castro-Castrezana<sup>6</sup>, Andrea Alicia Colli-  
8 Domínguez<sup>7</sup>, Edgar Cervantes-Trujano<sup>8</sup>, Isabel Erika Rucker-Joerg<sup>9</sup>, Fernando  
9 Lozano-Patiño<sup>10</sup>, Juan José Rivera-Alcocer<sup>11</sup>, Abraham Simón-Campos<sup>12</sup>, Efrén  
10 Alberto Sánchez-Campos<sup>13</sup>, Rafael Aguirre-Rivero<sup>14</sup>, Alejandro José Muñiz-  
11 Carvajal<sup>15</sup>, Luis del Carpio-Orantes<sup>16</sup>, Francisco Márquez-Díaz<sup>17</sup>, Tania Rivera-  
12 Hernández<sup>1,18</sup>, Alejandro Torres-Flores<sup>1,19</sup>, Luis Ramírez-Martínez<sup>20</sup>, Georgina Paz-  
13 De la Rosa<sup>20</sup>, Oscar Rojas-Martínez<sup>20</sup>, Alejandro Suárez-Martínez<sup>20</sup>, Gustavo  
14 Peralta-Sánchez<sup>20</sup>, Claudia Carranza<sup>2</sup>, Esmeralda Juárez<sup>21</sup>, Horacio Zamudio-  
15 Meza<sup>2</sup>, Laura E. Carreto-Binaghi<sup>2</sup>, Mercedes Viettri<sup>2</sup>, Damaris Romero-Rodríguez<sup>22</sup>,  
16 Andrea Palencia<sup>2</sup>, David Sarfati-Mizrahi<sup>20</sup>, Weina Sun<sup>23</sup>, Héctor Elías Chagoya-  
17 Cortés<sup>24</sup>, Felipa Castro-Peralta<sup>20</sup>, Peter Palese<sup>23</sup>, Florian Krammer<sup>23,25,26</sup>, Adolfo  
18 García-Sastre<sup>23,26,27,28,29,30</sup>, and Bernardo Lozano-Dubernard<sup>20\*</sup>

19 <sup>1</sup>Unidad de Investigación Médica en Inmunoquímica, UMAE Hospital de  
20 Especialidades, Centro Médico Nacional Siglo XXI, Instituto Mexicano del Seguro  
21 Social (IMSS), Ciudad de México (CDMX), México. <sup>2</sup>Laboratorio de Inmunobiología  
22 de la Tuberculosis, Instituto Nacional de Enfermedades Respiratorias (INER)  
23 "Ismael Cosío Villegas", CDMX, México. <sup>3</sup>ILS Clinical Research, S.C., CDMX,  
24 México. <sup>4</sup>Unidad de Investigación Médica en Epidemiología Clínica, UMAE Hospital  
25 de Especialidades, Centro Médico Nacional Siglo XXI, IMSS, CDMX, México.  
26 <sup>5</sup>Instituto Nacional de Ciencias Médicas y Nutrición Salvador Zubirán (INCMNSZ),  
27 CDMX, México. <sup>6</sup>CAIMED Investigación en Salud, S. A. de C. V., CDMX, México.  
28 <sup>7</sup>Oaxaca Site Management Organization (OSMO) S.C., Oaxaca, México. <sup>8</sup>Centro de  
29 Investigación Clínica Acelerada (CICA), S.C., CDMX, México. <sup>9</sup>Clinical Research  
30 Institute (CRI) S.C., Edo. de México, México. <sup>10</sup>Centro de Investigación Clínica  
31 Chapultepec, CDMX, México. <sup>11</sup>Unidad de Atención Médica e Investigación en  
32 Salud (UNAMIS), Yucatán, México. <sup>12</sup>Köhler & Milstein Research (K&M) Facultad de  
33 Medicina, Universidad Autónoma de Yucatán, Mérida, Yucatán, México. <sup>13</sup>Centro  
34 Multidisciplinario para el Desarrollo Especializado de la Investigación Clínica en  
35 Yucatán (CEMDEICY) S.C., Yucatán, México. <sup>14</sup>Centro de Investigación Clínica del  
36 Pacífico (CICPA), Guerrero, México. <sup>15</sup>Red OSMO, Centro de Investigación y  
37 Avances Médicos Especializados (CIAME), Quintana Roo, México. <sup>16</sup>Instituto  
38 Veracruzano de Investigación Clínica (IVIC) S.C., Veracruz, México. <sup>17</sup>Hospital de  
39 Cardiológica Aguascalientes, Aguascalientes, México. <sup>18</sup>Investigadores por México,  
40 Consejo Nacional de Humanidades, Ciencias y Tecnologías (CONAHCYT), CDMX,  
41 México. <sup>19</sup>Posgrado en Inmunología, Escuela Nacional de Ciencias Biológicas,

42 Instituto Politécnico Nacional, CDMX, México. <sup>20</sup>Laboratorio Avi-Mex S.A. de C.V.,  
43 CDMX, México. <sup>21</sup>Departamento de Investigación en Microbiología, INER “Ismael  
44 Cosío Villegas”, CDMX, México. <sup>22</sup>Unidad de Citometría, INER “Ismael Cosío  
45 Villegas”, CDMX, México. <sup>23</sup>Department of Microbiology, Icahn School of Medicine  
46 at Mount Sinai, New York, NY, USA. <sup>24</sup>Consultora Mexstrategy, S.A.S. de C.V.,  
47 CDMX, México. <sup>25</sup>Center for Vaccine Research and Pandemic Preparedness (C-  
48 VaRPP), Icahn School of Medicine at Mount Sinai, New York, NY, USA.  
49 <sup>26</sup>Department of Pathology, Molecular and Cell-Based Medicine, Icahn School of  
50 Medicine at Mount Sinai, New York, NY, USA. <sup>27</sup>Department of Medicine, Division of  
51 Infectious Diseases, Icahn School of Medicine at Mount Sinai, New York, NY, USA.  
52 <sup>28</sup>Global Health and Emerging Pathogens Institute, Icahn School of Medicine at  
53 Mount Sinai, New York, NY, USA. <sup>29</sup>The Tisch Cancer Institute, Icahn School of  
54 Medicine at Mount Sinai, New York, NY, USA. <sup>30</sup>The Icahn Genomics Institute, Icahn  
55 School of Medicine at Mount Sinai, New York, NY, USA.

56 \*Correspondence: [lozano@avimex.com.mx](mailto:lozano@avimex.com.mx) (B. Lozano-Dubernard),  
57 [constantino.lopez@imss.gob.mx](mailto:constantino.lopez@imss.gob.mx) (C. López-Macías)

## 58 **Abstract**

59 **Background:** The urgent need for safe, effective, and economical coronavirus  
60 disease 2019 (COVID-19) vaccines, especially for booster campaigns targeting  
61 vulnerable populations, prompted the development of the AVX/COVID-12 vaccine  
62 candidate. AVX/COVID-12 is based in a Newcastle disease virus La Sota (NDV-  
63 LaSota) recombinant viral vector. This vaccine expresses a stabilized version of the  
64 spike protein of severe acute respiratory syndrome coronavirus 2 (SARS-CoV-2),  
65 specifically the ancestral Wuhan strain. The study aimed to assess its safety,  
66 immunogenicity, and potential efficacy as an anti-COVID-19 booster vaccine.

67 **Methods:** In a phase II/III clinical trial conducted from November 9, 2022, to  
68 September 11, 2023, a total of 4,056 volunteers were enrolled. Participants received  
69 an intramuscular booster dose of either AVX/COVID-12 or AZ/ChAdOx-1-S  
70 vaccines. Safety, immunogenicity, and potential efficacy were assessed through  
71 various measures, including neutralizing antibody titers, interferon (IFN)- $\gamma$ -producing  
72 CD4+ T cells, and CD8+ T cells. The evaluation also involved immunobridging,  
73 utilizing the AZ/ChAdOx-1-S vaccine as an active comparator, and monitoring the  
74 incidence of COVID-19 cases.

75 **Findings:** The AVX/COVID-12 vaccine induced neutralizing antibodies against both  
76 the ancestral SARS-CoV-2 and the BA.2 and BA.5 Omicron variants. The geometric  
77 mean ratio of neutralizing antibody titers between individuals immunized with the  
78 AVX/COVID-12 vaccine and those with the AZ/ChAdOx-1-S vaccine at 14 days is  
79 0.96, with a confidence interval (CI) of 0.85-1.06. The outcome aligns with the non-  
80 inferiority criterion recommended by the World Health Organization (WHO),  
81 indicating a lower limit of the CI greater than or equal to 0.67. Induction of IFN- $\gamma$

82 producing CD8+ T cells at day 14 post-immunization was exclusively observed in  
83 the AVX/COVID-12 group. Finally, a trend suggested a potentially lower incidence  
84 of COVID-19 cases in AVX/COVID-12 boosted volunteers compared to AZ/ChAdOx-  
85 1-S recipients.

86 **Conclusion:** The AVX/COVID-12 vaccine proved safe, well-tolerated, and  
87 immunogenic. AVX/COVID-12 meets the WHO non-inferiority standard compared to  
88 AZ/ChAdOx-1-S. These results strongly advocate for AVX/COVID-12 as a viable  
89 booster dose, supporting its utilization in the population.

90 **KEYWORDS:** COVID-19 vaccine, Phase II/III clinical trial, Newcastle disease virus  
91 LaSota, SARS-CoV-2.

## 92 **Introduction**

93 Severe acute respiratory syndrome coronavirus 2 (SARS-CoV-2) and its variants of  
94 concern have caused hundreds of millions of infections and millions of deaths around  
95 the globe since 2020 (1).

96 At the beginning of 2021, anti-SARS-CoV-2 vaccination campaigns had been  
97 launched in almost 200 countries with more than 13.53 billion doses distributed (2);  
98 as of November 2022, emergency use approval has been granted to 50 vaccine  
99 candidates (3). These vaccines have shown to be effective in phase III clinical trials  
100 and to induce neutralizing antibodies that target the spike protein of SARS-CoV-2  
101 among other antigens less studied (4). In addition to the vaccines already in use,  
102 many other candidates are in a preclinical or clinical development.

103 Despite the remarkable speed in the development of coronavirus disease 2019  
104 (COVID-19) vaccines since 2020, there have been over 6.9 million official deaths  
105 from COVID-19 (1) (with estimates based on excess mortality being 3-4 times  
106 higher). Moreover, the unequal global distribution of vaccines, particularly impacting  
107 low- and middle-income countries (LMICs), underscores the urgency for the  
108 continued development of new vaccine platforms to address disparities in  
109 distribution. Ensuring a high vaccination rate worldwide is crucial for reducing the  
110 likelihood of new variant emergence. Additionally, the administration of periodic  
111 booster doses is essential to prevent subsequent waves of COVID-19 and safeguard  
112 vulnerable populations, including the elderly, immunocompromised individuals, and  
113 those with comorbidities. Consequently, the global vaccine supply remains an urgent  
114 issue that requires attention (5).

115 The AVX/COVID-12 vaccine candidate is a Newcastle disease virus LaSota (NDV-  
116 LaSota) vector-based vaccine that expresses the HexaPro version (6 prolines that  
117 stabilize the prefusion conformation) of the SARS-CoV-2 spike protein (6,7).

118 Among the main advantages offered by the NDV-LaSota vector is the standardized  
119 production process in embryonated chicken eggs, easy to develop in existing  
120 facilities for the manufacture of influenza vaccines, achieving the production of large

121 numbers of doses in a short time (8). Therefore, this could help to fulfill vaccine  
122 demand, particularly in countries with a low immunization rate or incomplete  
123 vaccination scheme.

124 The NDV-LaSota vector, expressing the spike protein of the SARS-CoV-2 virus, has  
125 demonstrated efficacy in preclinical studies, particularly in mice and hamsters.  
126 Following intranasal (IN) immunization in mice, the generation of IgA and IgG2a  
127 antibodies, with a response of IFN- $\gamma$ -producing T cells, was observed. This vector  
128 provided complete protection against infection in mice and hamsters, indicated by  
129 the absence of viral titers and viral antigen in the lungs of mice and a significant  
130 reduction in SARS-CoV-2 shedding in hamsters (8,9).

131 Preclinical trials involving pigs were conducted in Mexico to assess the safety and  
132 immunogenicity of the AVX/COVID-12 vaccine when administered via intramuscular  
133 (IM) or IN routes. The study revealed robust responses in serum-neutralizing  
134 antibodies, with notable reactivity to variants of concern (VOCs) carrying mutations  
135 in the spike protein epitopes (10). In a Phase I clinical trial (NCT04871737) with 91  
136 volunteers, the vaccine was evaluated with various booster regimens administered  
137 through both IM and IN routes, demonstrating significant immunogenicity in both  
138 cases. The safety of this vaccine was also confirmed in these studies, establishing  
139 the foundation for further clinical development (11).

140 Similar vaccines are undergoing clinical trials, with a live version being tested in the  
141 United States (NCT05181709), whereas inactivated vaccines based on the same  
142 vector are also in clinical testing, with ongoing trials in Vietnam (Phase I  
143 NCT04830800), Thailand (Phase I/II NCT04764422, Phase III TCTR20221026004),  
144 and Brazil (Phase I NCT04993209 and Phase II/III NCT05354024). Available reports  
145 indicate favorable safety and immunogenicity profiles for these vaccines (12–14).  
146 Recently, an inactivated version of this vaccine was authorized for emergency use  
147 as a booster for the prevention of severe COVID-19 in Thailand (15).

148 In Phase II clinical trials, the AVX/COVID-12 vaccine underwent assessment through  
149 both IM and IN administrations as a booster dose. The study demonstrated safety  
150 and immunogenicity via both routes in volunteers who had previously received  
151 mRNA, AZ/ChAdOx-1-S, or inactivated virus vaccines or were infected with SARS-  
152 CoV-2, all of whom initially exhibited anti-spike IgG titers below 1,200 units (U)/mL  
153 in a chemiluminescence test. AVX/COVID-12 IM or IN immunization induced a  
154 significant ( $\geq 2.5$  fold) increase in the neutralizing antibody response against SARS-  
155 CoV-2 variants of concern by day 14, despite expressing the original Wuhan-1 strain  
156 spike protein. Noteworthy elevations in neutralizing antibodies against multiple  
157 variants of concern, including Alpha, Beta, Delta, and Omicron (BA.2 and BA.5),  
158 were observed when compared to the placebo groups (16).

159 In this phase II/III parallel study, we investigated the safety and immunogenicity of a  
160 single intramuscular booster dose of AVX/COVID-12 in healthy adults with a history  
161 of prior COVID-19 vaccination and/or SARS-CoV-2 infection. Unlike in the Phase II



162 trial, participants were included irrespective of their initial anti-S antibody levels.  
163 Given the pandemic situation during the recruiting period of the trial (Figure 1S),  
164 enrolled individuals exhibited a wide range of baseline antibody titers. Additionally,  
165 we conducted an active-controlled non-inferiority study (immunobridging) using the  
166 AZ/ChAdOx-1-S vaccine as the comparator, as both are vectorized vaccines. The  
167 AZ/ChAdOx-1-S vaccine has proven to be safe and effective against SARS-CoV-2  
168 infection, demonstrating an effectiveness of 84.3% against asymptomatic SARS-  
169 CoV-2 infection and 98.9% against COVID-19 hospitalization (17,18). Moreover, it  
170 has become the most widely used vaccine globally, deployed in 185 countries since  
171 its approval for emergency use (19). In Mexico, since November 2021, more than  
172 79.43 million doses have been administered, covering single-dose, full vaccination,  
173 and booster regimens, utilizing both homologous and heterologous systems (20).  
174 The characteristics of AZ/ChAdOx-1-S make it a suitable comparator for testing  
175 AVX/COVID-12 in a non-inferiority trial.

## 176 **Material and methods**

### 177 **Study design**

178 A phase II/III double-blind study (ClinicalTrials.gov #NCT05710783) was conducted  
179 to assess the safety, immunogenicity, and post-boosting incidence of SARS-CoV-2  
180 infection following a single IM dose of SARS-CoV-2 vaccine (AVX/COVID-12)  
181 “Patria”. The primary objective was to establish non-inferiority in the SARS-CoV-2  
182 neutralizing antibodies production at day 14 post-administration by comparing it with  
183 an active control, the AZ/ChAdOx-1-S vaccine. Randomization involved the  
184 administration of a single IM dose of the experimental AVX/COVID-12 vaccine at a  
185 concentration of  $10^{8.0}$  tissue culture infective dose 50% (TCID<sub>50%</sub>) per dose and a  
186 single IM dose of the AZ/ChAdOx-1-S vaccine at a concentration of  $10^{10}$  viral  
187 particles per dose for subsequent non-inferiority analysis.

188 The protocol was formulated by iLS Clinical Research, S.C. in collaboration with the  
189 Mexican Institute for Social Security (IMSS) and Laboratorio Avi-Mex, S.A. de C.V.  
190 (Avimex®), which was the sponsor. Approval for the study was granted by the  
191 Federal Commission for the Protection against Sanitary Risks (COFEPRIS) in  
192 Mexico, assigned the number RNEC2022-AVXSARSCoV2VAC005. Ethics approval  
193 was obtained from the institutional ethics committee at each research site  
194 participating in the study. The research was conducted in complete compliance with  
195 Mexican regulations and in accordance with the principles outlined in the Declaration  
196 of Helsinki and Good Clinical Practice. Immunological assay samples were  
197 processed at the National Institute for Respiratory Diseases (INER) in Mexico City.

### 198 **Study groups**

199 The study groups comprised adults aged 18 years or older, of both genders, who  
200 were in good health and had received at least one dose of an approved SARS-CoV-  
201 2 vaccine. Inclusion criteria for the study involved a negative PCR test for SARS-

202 CoV-2 during the screening visit, a negative pregnancy test in women of childbearing  
203 potential, a commitment to maintaining adequate prevention measures to avoid  
204 infection with SARS-CoV-2 throughout their participation in the study, especially  
205 during the first 14 days after the baseline visit. Importantly, there were no restrictions  
206 based on the baseline antibody titers for eligibility in the study.

207 The exclusion criteria encompassed hypersensitivity or allergy to any ingredient of  
208 the vaccine, a history of severe anaphylactic reactions, fever at the baseline visit,  
209 receipt of the last COVID-19 vaccination within the past 4 months, SARS-CoV-2  
210 infection within the last month, pregnancy or nursing status, chronic diseases  
211 requiring the use of immunosuppressive agents or immune response modulators  
212 (e.g., systemic corticosteroids, cyclosporine, rituximab), active chemotherapy  
213 treatment for cancer, a history of human immunodeficiency virus (HIV) infection, and  
214 chronic renal or liver disease with a recent history of infectious conditions requiring  
215 hospitalization or intravenous drug treatment within the year before the baseline visit.

216 The randomization of volunteers was conducted using a computer-based  
217 assignment system, ensuring blinding throughout the study. Upon signing the  
218 informed consent form, each participant received a patient number, encoding all their  
219 information in a pseudo-anonymized manner during data collection and becoming  
220 fully anonymized during the analysis. The stratification for subject randomization is  
221 as follows: In phase 2 and the immunobridging phase, blocks of 8 were created, with  
222 each block randomly assigning 4 subjects to receive the AVX/COVID-12 vaccine  
223 and 4 subjects to receive the AZ/ChAdOx-1-S vaccine. In the follow-up safety phase  
224 III, blocks of 8 were also created, with all subjects receiving the AVX/COVID-12  
225 vaccine.

226 In phase II, participants were enrolled to receive either the AVX/COVID-12 or  
227 AZ/ChAdOx-1-S vaccine. During phase III immunobridging, the phase II participants  
228 were included, and new participants were enrolled. For the phase II/III safety  
229 assessment, volunteers from the phase III immunobridging and phase II participants  
230 were included. Additionally, more volunteers were recruited to receive the  
231 AVX/COVID-12 vaccine (Figure 1).

## 232 **Safety**

233 Safety was assessed through active and passive monitoring of adverse events (AEs)  
234 in both the AZ/ChAdOx-1-S and AVX/COVID-12 vaccine groups, taking into account  
235 their severity and their relationship to the intervention. The study comprised four  
236 visits, with the option for additional visits in case of suspected SARS-CoV-2 infection.  
237 While all participants completed the same visits, those assigned to different groups  
238 (described above and in Figure 1) underwent additional sample collections during  
239 visits on days 0, 14, 90, and 180 of the study.

240 The primary endpoints in the phase II/III and the immunobridging aspects of this trial  
241 included solicited local and systemic reactions. These reactions were assessed at

242 the time participants entered the study and continued throughout a 6-month follow-  
243 up period. Additionally, the study reported the incidence of symptomatic, severe, or  
244 fatal cases of COVID-19.

245 The classification of potential AEs and their association with vaccine exposure  
246 followed a two-period analysis. The first period included the initial 7 days following  
247 vaccination, during which adverse reactions were deemed related to the vaccine  
248 components (19). Conversely, reactions occurring after 7 days, typically in response  
249 to the development of an immune response, constituted the second analysis period  
250 (19).

### 251 **Sample collection**

252 Venous blood samples were obtained from participants during scheduled site visits  
253 for serology tests and cellular response assessments. The samples were collected  
254 into two sodium heparin tubes and one separator tube (SST BD vacutainer tubes,  
255 Franklin Lakes, NJ, USA) through standard phlebotomy procedures. Following  
256 collection, the samples were transported at room temperature to the INER for  
257 immediate processing. All blood samples and their products were handled in a  
258 biosafety level (BSL)-2 laboratory, employing appropriate personal protective  
259 equipment and safety precautions, adhering to processing protocols approved by  
260 the Institutional Biosafety Committee. Serum isolation was performed by centrifuging  
261 venous blood collected into SST at 2,260 x g for 10 minutes to separate the serum.  
262 The resulting serum was carefully extracted from the upper portion of the tube,  
263 aliquoted, and then stored at -20 °C until needed.

### 264 **Peripheral blood mononuclear cell (PBMC) isolation**

265 PBMC were isolated from venous blood collected in sodium heparin tubes (BD  
266 vacutainer tubes, Franklin Lakes, NJ, USA). Within four hours of collection, PBMC  
267 isolation was conducted by density-gradient sedimentation of whole blood diluted at  
268 a 1:2 ratio in Roswell Park Memorial Institute (RPMI) 1640 medium (Lonza, Basel,  
269 Switzerland) at room temperature. The diluted blood was layered over an  
270 appropriate volume of room-temperature Lymphoprep (Axis-Shield Diagnostics,  
271 Dundee, UK). Then, the PBMC were then recovered, cryopreserved in a medium  
272 consisting of 10% dimethyl sulfoxide (DMSO) (Sigma Aldrich, St. Louis, MO, USA)  
273 and 90% heat-inactivated fetal bovine serum (FBS; GIBCO, California, USA), and  
274 stored at -80 °C until use. For T cell assays, the thawing process involved warming  
275 frozen cryovials at 37 °C in a water bath, and cells were resuspended in 5 mL of  
276 CTS OpTmizer (GIBCO, California, USA). After a wash with OpTmizer, cells were  
277 counted using a Neubauer chamber, and the viability was assessed by trypan blue.  
278 Cells were resuspended in OpTmizer medium to a density of  $4 \times 10^6$  cells/mL.

279 The subunit 1 of the spike protein of SARS-CoV-2 (RayBiotech, Peachtree Corners,  
280 GA, USA) was selected as the primary antigen due to its display of most  
281 immunogenic epitopes of the spike protein. Additionally, it contains the receptor

282 binding domain (RBD) fragment of the virus, which mediates binding to the host  
283 receptor angiotensin-converting enzyme 2 (ACE2).

#### 284 **Pseudovirus neutralization assay**

285 The pseudovirus neutralization assay employed pseudovirus particles based on  
286 replication-competent vesicular stomatitis virus (VSV)-eGFP-SARS-CoV-2. These  
287 particles encoded the spike gene of the ancestral Wuhan-1 strain, as well as  
288 Omicron subvariants BA.2 (VSV-SARS-CoV-2 BA.2 clone 1) and BA.5 (VSV-SARS-  
289 CoV-2 BA.5 clone 4). The pseudovirus particles were generously provided by Sean  
290 Whelan and used in pseudoviral microneutralization assays.

291 Prior to use in the neutralization assay, all sera were heat-inactivated at 56 °C for 30  
292 minutes. Vero E6 cells (ATCC CRL-1586, Manassas, VA, USA) were seeded at a  
293 density of  $1.3 \times 10^4$  cells per well in 96-well plates with 100  $\mu$ L of complete EMEM  
294 (Eagle's minimum essential medium, ATCC, 30-2003 Manassas, VA, USA)  
295 supplemented with 10% fetal bovine serum; (FBS; Gibco, Waltham, MA, USA). The  
296 cells were then incubated for 24 hours at 37 °C with 5% CO<sub>2</sub>, allowing them to reach  
297 approximately 85% confluence.

298 The next day, serum samples were diluted in EMEM medium without FBS using a  
299 3-fold serial dilution, starting with a 1:60 dilution. These diluted samples were mixed  
300 with 100 TCID<sub>50</sub> of VSV-SARS-CoV-2 spike pseudoparticles of the ancestral Wuhan-  
301 1 strain or Omicron variants. The mixture was incubated for 60 minutes at 37 °C with  
302 5% CO<sub>2</sub> to facilitate the neutralization process. Subsequently, each dilution was  
303 transferred to a parallel plate containing Vero E6 monolayers and incubated at 37  
304 °C with 5% CO<sub>2</sub> for 72 hours.

305 After the incubation period, 3.7% formaldehyde was added to the culture plates and  
306 the plates were incubated 30-40 minutes at room-temperature. Then, the  
307 formaldehyde was discarded, and the plates were washed twice with phosphate-  
308 buffered saline (PBS; Lonza, Basel, Switzerland). The neutralizing activity of each  
309 sample was reported as the titer, represented by the reciprocal of dilution, where the  
310 cell protection is 50%; to get this value, we considered the last serum dilution at  
311 which the wells are non-infected and with this data, the half maximal 50% inhibitory  
312 dilution (ID<sub>50</sub>) was calculated using the Spearman-Kaerber analysis method. This  
313 analysis was based on the presence or absence of cellular damage (cytopathic  
314 effect). Each sample was tested in duplicate.

#### 315 **Intracellular cytokine staining assay**

316 Cells were costimulated for 16 hours with costimulation anti-human CD28/CD49d  
317 (BD Biosciences, San Jose, CA, USA), spike subunit 1 protein at a concentration of  
318 5  $\mu$ g/mL. Medium served as a negative control, and phytohemagglutinin (PHA; 1  
319 mg/mL) as a positive control. Monensin (GolgiStop BD, San José, CA, USA) was  
320 added, and the samples were incubated for 4 hours at 37 °C.



321 After stimulation, the samples were washed with PBS (Lonza, Walkersville, MD,  
322 USA) and stained with Live/Dead Fixable near 633 or 635nm (Invitrogen, Waltham,  
323 MA, USA) (diluted 1:1000) for 15 minutes at room temperature in the dark.  
324 Subsequently, cell surface staining was performed using a cocktail of anti-human  
325 CD3-Alexa Fluor 700 (Biolegend, San Diego, CA, USA), CD4-PerCP/Cy5.5  
326 (Biolegend, San Diego, CA, USA), and CD8-PE/Cy7 (Biolegend, San Diego, CA,  
327 USA) antibodies in cell staining buffer (BioLegend, San Diego, CA, USA). The  
328 mixture was incubated for 15 minutes at room temperature in the dark, followed by  
329 an additional washing step with cell staining buffer.

330 The cells were fixed and permeabilized using Cytotfix/Cytoperm (BD, San Jose, USA)  
331 for 20 minutes at room-temperature. After centrifugation, Perm/Wash (BD, New  
332 Jersey, USA) was added. Then, intracellular staining was then performed using a  
333 cocktail of anti-human IFN- $\gamma$ -FITC (BD, San Jose, USA), TNF- $\alpha$  APC (Biolegend,  
334 San Diego, CA, USA), and IL-2-BV605 (Biolegend, San Diego, CA, USA) antibodies  
335 in Perm/Wash solution for 30 minutes at room temperature in the dark. After washing  
336 with BD Perm/Wash buffer (BD, San Jose, USA), the cells were resuspended in PBS  
337 and kept at 4 °C in the dark until acquisition and analysis. Unstained and  
338 fluorescence minus one (FMO) controls were included.

339 Sample acquisition was carried out on a BD Symphony A1 instrument, previously  
340 calibrated with standardized Cytometer Setup and Tracking (CST) beads (BD, San  
341 Jose, USA) used for daily quality control. Compensation was performed using  
342 CompBeads (BD, San Jose, USA). At least 200,000 events of the lymphocyte region  
343 in a Forward Scatter (FSC) vs Side Scatter (SSC) plot were acquired per sample.  
344 Analysis was conducted using FACSDiva 8.0.3, and gates for identification of SARS-  
345 CoV-2 antigen-specific cytokine-producing CD3+, CD4+, or CD8+ T cells were  
346 defined using the FMO controls. This study was approved by the Institutional Review  
347 Board for Human Subjects Research at INER.

### 348 **Statistical analysis**

349 We present results encompassing safety, immunogenicity, efficacy, and a sample  
350 size determined through statistical hypothesis testing. To outline the study  
351 population demographic characteristics, measures of central tendency and  
352 dispersion were employed for continuous variables, while proportions were utilized  
353 for discrete or categorical variables. Continuous variables underwent analysis using  
354 the student's t-test or non-parametric test where specified, and the categorical  
355 variables were compared through a chi-square test.

356 Safety analysis involved the AEs comparison in participants vaccinated with  
357 AZ/ChAdOx-1-S (control group) and AVX/COVID-12 (experimental group),  
358 considering both severity and their relationship to the intervention. The Z-test was  
359 employed to compare the proportions of reported adverse effects between treatment  
360 groups.

361 Variations in the neutralizing antibody titers and secreted IFN- $\gamma$  levels were  
362 determined. Statistically significant differences in intra-groups in geometric mean  
363 neutralization titers between day 0 and day 14, 90, and 180 were analyzed using a  
364 paired t-test for the variable on a logarithmic scale, and the differences in IFN- $\gamma$   
365 production were determined using Wilcoxon signed ranks test. Significance was set  
366 at p-values < 0.05. The confidence interval for the non-inferiority criteria was  
367 obtained through a student's t-test for the variable on a logarithmic scale.

368 The analysis of the incidence of symptomatic, severe, or fatal cases of COVID-19 is  
369 described by Nelson Alen's cumulative hazard rate, and the difference between  
370 groups was evaluated with a log rank test.

371 The statistical analysis was performed with STATA v 17.0 (StataCorp, College  
372 Station, TX, USA).

## 373 **Results**

### 374 **Randomization of study participants**

375 From November 9, 2022, to September 11, 2023, a total of 4,201 volunteers  
376 underwent eligibility assessments, and 134 subjects were excluded due to failure to  
377 meet eligibility criteria. The distribution of recruited volunteers is depicted in Figure  
378 1. Various research sites across different states of Mexico participated in volunteer  
379 recruitment, including Aguascalientes (Hospital Cardiológica Aguascalientes),  
380 Guerrero (CICPA Centro de Investigación Clínica del Pacífico), Mexico City  
381 (CAIMED Investigación en Salud, S.A. de C.V., Centro de Investigación Clínica  
382 Chapultepec, CICA Centro de Investigación Clínica Acelerada, S.C., INCMNSZ  
383 Instituto Nacional de Ciencias Médicas y Nutrición Salvador Zubirán, Unidad de  
384 Medicina Familiar No. 20 IMSS), Michoacán (Sociedad Administradora de Servicios  
385 de Salud, S.C.), Oaxaca (OSMO Oaxaca Site Management Organization S.C.),  
386 Quintana Roo (Red OSMO Centro de Investigación y Avances Médicos  
387 Especializados), State of Mexico (CRI Clinical Research Institute S.C.), Veracruz  
388 (Instituto Veracruzano de Investigación Clínica S.C.), and Yucatán (Centro  
389 Multidisciplinario para el Desarrollo Especializado de la Investigación Clínica en  
390 Yucatán (CEMDEICY) S.C.P., K&M Köhler & Milstein Facultad de Medicina,  
391 Universidad Autónoma de Yucatán, Mérida, Unidad de Atención Médica e  
392 Investigación en Salud (UNAMIS)).

393 A total of 4,067 participants were initially randomized for the study, with 11  
394 withdrawing consent post-randomization, and 4,056 were vaccinated. In phase II,  
395 422 participants were enrolled, with 218 receiving the AVX/COVID-12 vaccine and  
396 204 administered the AZ/ChAdOx-1-S vaccine. In phase III immunobridging, 1,417  
397 participants were enrolled, including 705 who received the AVX/COVID-12 vaccine  
398 and 712 who received the AZ/ChAdOx-1-S vaccine. For phase II, 44 AVX/COVID-  
399 12 and 36 AZ/ChAdOx-1-S vaccinees dropped out, leaving 174 AVX/COVID-12 and  
400 168 AZ/ChAdOx-1-S participants who completed the study. In phase III

401 immunobridging, 143 AVX/COVID-12 and 127 AZ/ChAdOx-1-S vaccinees dropped  
402 out, leaving 562 AVX/COVID-12 and 585 AZ/ChAdOx-1-S participants who  
403 completed the study. For phase II/III safety, 4,056 participants were enrolled, 3,120  
404 received AVX/COVID-12. In addition, 936 volunteers were vaccinated with  
405 AZ/ChAdOx-1-S. 225 dropouts were recorded from the AVX/COVID-12 group and  
406 127 from the AZ/ChAdOx-1-S group (Figure 1).

407 For the groups vaccinated with AVX/COVID-12 and AZ/ChAdOx-1-S, the average  
408 age was 39 years. No statistically significant differences were observed between the  
409 groups in terms of age, sex, race, or comorbidities, suggesting that both groups are  
410 comparable concerning these variables (Table 1).

411 Information regarding prior SARS-CoV-2 infection and vaccination history was  
412 collected from participants in the immunobridging study (Table 2). Results show no  
413 statistically significant difference in the average time since the last infection and that  
414 the proportion of subjects with a history of SARS-CoV-2 infection is the same for  
415 both groups. Similarly, the proportion of subjects vaccinated with different vaccine  
416 technologies is comparable, considering the number of doses received.

#### 417 **Safety after boosting with AVX/COVID-12**

418 Out of the total population evaluated for safety (n=4,056 subjects), 2,111 vaccinated  
419 subjects reported adverse events during the study. Among them, 51.37% of the  
420 subjects in the AVX/COVID-12 group (n=1,603) and 54.27% in the AZ/ChAdOx-1-S  
421 group (n=508) experienced adverse events, showing no statistically significant  
422 differences among the groups (Figure 2A). When categorizing events by severity  
423 (mild, moderate, or severe), it was observed that for mild events, a higher proportion  
424 of subjects were affected in the AZ/ChAdOx-1-S group compared to the  
425 AVX/COVID-12 vaccine group (p=0.02). Conversely, for moderate adverse events,  
426 the proportion was higher in individuals who received the AVX/COVID-12 vaccine  
427 (p=0.01). Finally, for severe adverse events, no statistically significant differences  
428 were observed between the two groups (Figure 2A).

429 In the context of local adverse events of special interest, 800 volunteers (25.64%)  
430 were documented in the AVX/COVID-12 vaccinated group, while 193 volunteers  
431 (20.61%) were recorded in the AZ/ChAdOx-1-S vaccinated group. This indicates a  
432 statistically significant difference (p=0.002), with a higher incidence observed in the  
433 AVX/COVID-12 group compared to the AZ/ChAdOx-1-S group. Regarding  
434 musculoskeletal and connective tissue disorders, nervous system disorders, and  
435 skin and subcutaneous tissue disorders, there were no statistically significant  
436 differences observed between the two groups (Figure 2B). The analyzed disorders  
437 include musculoskeletal and connective tissue issues (arthralgia, myalgia, back  
438 pain, pain in a limb, and limb discomfort), local general disorders (heat, pain, edema,  
439 redness, hematoma, swelling, induration, inflammation, nerve injury, itching at the  
440 injection site) nervous system disorders (paresthesia) and skin and subcutaneous  
441 tissue disorders (erythema, papule, and itching) (Table 1S).

442 For systemic AEs of special interest within 7 days post-vaccination, statistically  
443 significant differences were observed only in cases of mild severity. Specifically, 496  
444 cases (15.89%) were reported in volunteers from the AVX/COVID-12 group,  
445 compared to 183 cases (19.55%) from the AZ/ChAdOx-1-S group ( $p=0.008$ ) (Table  
446 S2). Importantly, there was a statistically significant difference in general disorders  
447 and administration site alterations in favor of the AVX/COVID-12 group ( $p=0.0008$ )  
448 (Figure 2C). The analyzed disorders include vascular (flushing, hypertensive crisis,  
449 and hypotension), respiratory, thoracic, and mediastinal (asthma, nasal congestion,  
450 dyspnea, pharyngolaryngeal pain, hiccups, allergic rhinitis, rhinorrhea, cough, and  
451 productive cough), and psychiatric (mood changes, confusional state, insomnia, and  
452 irritability), ocular (allergic conjunctivitis and photopsia), musculoskeletal and  
453 connective tissue (arthralgia, back pain, myalgia, ligament sprain, muscle spasms,  
454 and discomfort in limbs), systemic general disorders, and administration site  
455 alterations (asthenia, chest pain, influenza-like illness, shivering, fatigue, peripheral  
456 coldness, hyperthermia, inflammation, discomfort, general discomfort, chest  
457 tightness, pyrexia, decreased thirst, and feeling cold), gastrointestinal (diarrhea,  
458 abdominal distension, abdominal pain, upper abdominal pain, constipation, nausea,  
459 odynophagia, vomiting, and aphthous ulcer), and nervous system (headache,  
460 dizziness, migraine, paresthesia, drowsiness, and tremor), immune system  
461 (hypersensitivity), ear and labyrinth (vertigo), metabolism and nutrition (decreased  
462 appetite), reproductive and breast (polymenorrhea, heavy menstrual bleeding, and  
463 menstrual disorders), skin and subcutaneous tissue (rash, excessive sweating, skin  
464 lesions, and hives), cardiac (chest pain, palpitations, and tachycardia), and  
465 infections (oral herpes) (Table 2S).

466 Regarding participants who experienced AEs potentially associated with the  
467 vaccine, a total of 539 volunteers (17.27%) from AVX/COVID-12 and 122 from  
468 AZ/ChAdOx-1-S (13.03%) were reported. Significant differences ( $p=0.01$ ) were  
469 observed in general disorders and administration site alterations (asthenia, pain at  
470 the injection site, edema at the injection site, erythema at the injection site, chill,  
471 fatigue, hematoma at the injection site, swelling, induration at the injection site,  
472 inflammation at the injection site, nerve injury at the injection site, discomfort, general  
473 discomfort, fever, and decreased thirst), predominantly occurring in volunteers  
474 vaccinated with AVX/COVID-12 (Figure 2D). No statistical differences were  
475 observed in the other analyzed disorders (Figure 2D).

#### 476 **AVX/COVID-12 booster-induced neutralizing antibody titers against Wuhan-1** 477 **strain and Omicron SARS-CoV-2 variants of concern**

478 The evaluation of neutralizing antibody titers in sera from AVX/COVID-12 boosted  
479 volunteers against the spike protein was conducted using the pseudovirus  
480 neutralization assay at 0, 14, 90, and 180 days post-immunization. Following the  
481 booster with AVX/COVID-12, anti-SARS-CoV-2 antibody titers against the ancestral  
482 Wuhan-1 strain or Omicron (BA.2 and BA.5) variants of concern were induced.  
483 Specifically, titers against the ancestral Wuhan-1 variant significantly increased at



484 day 14 and slightly declined at day 90 and 180 post-immunization. In contrast, for  
485 the BA.2 and BA.5 variants, significantly higher neutralizing titers were observed at  
486 days 14, 90, and 180 after boosting (Figure 3A).

487 The pattern of neutralizing titers remained consistent for BA.2 and BA.5 variants,  
488 depicting an increase at days 14 and 90, followed by a decline at day 180 post-  
489 boosting (Figure 3A). Notably, neutralizing antibody titers against the BA.2 and BA.5  
490 variants were 1 to 3 times lower than those observed against the ancestral Wuhan-  
491 1 strain. Despite the decrease in titers at day 180, it is important to highlight that  
492 these titers against the BA.2 and BA.5 variants remained significantly higher  
493 compared to baseline levels before boosting with the AVX/COVID-12 vaccine.

494 As part of exploratory objectives, the magnitude of the increase in neutralizing titers  
495 at 0, 14, 90, and 180 days, following the administration of the AVX/COVID-12  
496 vaccine in a single IM booster dose regimen, was analyzed. This analysis was  
497 stratified based on the immunization/infection history at the time of recruitment  
498 (Figure 3B). The data consistently demonstrate significantly increased titers at day  
499 14 across all subgroups. However, following this time point, titers tended to decrease  
500 in all four subgroups. Based on this analysis, no differences were noted among the  
501 subgroups following the administration of the AVX/COVID-12 vaccine booster  
502 (Figure 3B). Here, “homologous boost” indicates using the same vaccine platform as  
503 the primary series, whereas “heterologous boost” refers to employing a different  
504 vaccine platform for the primary series. Analysis of the groups was conducted  
505 irrespective of their prior infection status (Figure 3B)

506 The neutralizing antibody titers following AVX/COVID-12 and AZ/ChAdOx-1-S  
507 boosting were evaluated across participants with comorbidities and different age  
508 groups. The antibody titers at day 0 and day 14 indicated that both vaccines induced  
509 similar enhancements in neutralizing antibody titers among participants with  
510 comorbidities and those aged > 65 and < 65 years (Figure 2S).

### 511 **Phase III immunobridging**

#### 512 **Similar neutralizing antibody responses after booster doses of AVX/COVID-12** 513 **or AZ/ChAdOx-1-S vaccines**

514 The non-inferiority of AVX/COVID-12, in comparison to the AZ/ChAdOx-1-S vaccine,  
515 was evaluated in 705 volunteers who received the AVX/COVID-12 booster and 712  
516 who received the AZ/ChAdOx-1-S booster. Both groups were comparable, showing  
517 no statistical differences in age, gender, or race. However, there were statistically  
518 significant differences observed in individuals with obesity and normal body mass  
519 index (BMI), as well as those with 0 or 1 comorbidities. Nevertheless, no differences  
520 were noted among underweight and overweight volunteers or individuals with 1, 2,  
521 and 3 or more comorbidities (Table 3). Additionally, there were no statistically  
522 significant differences in volunteers based on their prior infection or vaccination  
523 history (Table 4).



524 The assessment of the non-inferiority of the AVX/COVID-12 vaccine, compared to  
525 the AZ/ChAdOx-1-S vaccine, was conducted by calculating the confidence interval  
526 for the ratio of geometric means of neutralizing titers and the confidence interval for  
527 the difference in the proportion of subjects with seroconversion, following the WHO  
528 guidelines for non-inferiority vaccine studies (19).

529 The analysis of the anti-Wuhan-1 strain neutralizing titers revealed well-balanced  
530 baseline values for the overall subject sample ( $p=0.23$ ) (Table 5). The geometric  
531 mean ratio between those immunized with the AVX/COVID-12 vaccine and those  
532 with the AZ/ChAdOx-1-S vaccine at 14 days is 0.96, with a confidence interval of  
533 0.85-1.06 (Table 5), demonstrating that AVX/COVID-12 is non-inferior to  
534 AZ/ChAdOx-1-S (Figure 4A). This result aligns with the non-inferiority criterion  
535 recommended by the WHO, indicating a lower limit of the confidence interval greater  
536 than or equal to 0.67 (21).

537 Upon further analysis of the neutralizing response, when stratifying boosted  
538 volunteers into seroconverted and non-seroconverted groups, it was found that  
539 58.15% of subjects in the AVX/COVID-12 vaccinated group seroconverted, while in  
540 the AZ/ChAdOx-1-S vaccinated group, the proportion was 55.75%. The  
541 AVX/COVID-12 vaccinated group maintains a 2.4% advantage over the  
542 AZ/ChAdOx-1-S vaccinated group, with a confidence interval (CI) of -2.7 to 7.5. This  
543 outcome is consistent with the protocol non-inferiority criterion, indicating that the  
544 difference in both percentages should not exceed -10 (21). Notably, individuals in  
545 both vaccine groups who experienced seroconversion exhibited an approximately  
546 fourfold increase in their neutralizing titers 14 days after immunization. Conversely,  
547 the group that did not undergo seroconversion showed a decline in neutralizing titers  
548 at day 14 after boost for both vaccines (Figure 4B). This group was characterized by  
549 individuals with high titers of neutralizing antibodies prior to the vaccination boost,  
550 and these titers still remained high after the observed decline and day 14 after the  
551 boost (Figure 4B)

#### 552 **T-cell responses among participants immunized with AVX/COVID-12 or** 553 **AZ/ChAdOx-1-S vaccines.**

554 The production of IFN- $\gamma$  by peripheral blood total, CD4+, and CD8+ T cells in  
555 response to stimulation with the subunit 1 of the spike protein of SARS-CoV-2 was  
556 assessed on days 0, 14, 90, and 180 in PBMCs from volunteers who received  
557 booster doses of AVX/COVID-12 (Figure 5A) or AZ/ChAdOx-1-S (Figure 5B), using  
558 flow cytometry.

559 In subjects vaccinated with AVX/COVID-12, a slight increase in total T cells and  
560 CD4+ T cells producing IFN- $\gamma$  was observed on day 14; however, this rise did not  
561 reach statistical significance. Nevertheless, a notable increase in the percentage of  
562 IFN- $\gamma$ -producing CD8+ T cells ( $p=0.006$ ) was detected on day 14 compared to the  
563 baseline levels on day 0 (Figure 5A and Table 3S). Statistically significant decreases

564 were observed in total IFN- $\gamma$ -producing T cells only at day 180. In the case of the  
565 IFN- $\gamma$ -producing CD4+ T cells, a decrease was noted at day 90 with no further  
566 decrease. For IFN- $\gamma$ -producing CD8+ T cells, the reduction was observed only at  
567 day 180 (Figure 5A and Table 3S).

568 For volunteers immunized with AZ/ChAdOx-1-S, no significant increases were noted  
569 in total CD4+ and CD8+ IFN- $\gamma$ -producing T cells (Figure 5B and Table 3S).  
570 Statistically significant decreases in IFN- $\gamma$ -producing T cells were observed only at  
571 days 90 and 180. In the case of the IFN- $\gamma$ -producing CD4+ T cells, the decrease  
572 occurred at day 14, with no further drop observed. Finally, a reduction in IFN- $\gamma$ -  
573 producing CD8+ T cells was observed at day 90, with no subsequent change (Figure  
574 5B and Table 3S). In Figure 5, statistically significant increases are depicted in black,  
575 and decreases are shown in red.

### 576 **Similar incidence of COVID-19 cases in volunteers boosted with AVX/COVID- 577 12 or AZ/ChAdOx-1-S vaccines**

578 As part of the secondary objectives for phase III, the occurrence of symptomatic  
579 COVID-19 cases was documented for both the AVX/COVID-12 and AZ/ChAdOx-1-  
580 S groups of boosted volunteers during the 14 days following administration. A total  
581 of 37 COVID-19 cases (5.5%) were recorded in the AVX/COVID-12 boosted group,  
582 and 42 cases were reported in the AZ/ChAdOx-1-S group (6.3%), resulting in an  
583 incidence rate per 1000 days of 0.29 and 0.32 for AVX/COVID-12 and AZ/ChAdOx-  
584 1-S, respectively (Table 6). Despite the trial not being designed for efficacy analysis,  
585 the log rank test indicated no significant difference in the cumulative incidence of  
586 COVID-19 cases between both groups ( $p=0.42$ ) (Table 6). Additionally, a  
587 comparison of Nelson-Aalen cumulative hazard incidence curves for COVID-19  
588 cases reported during the 180 days after boosting with AVX/COVID-12 or  
589 AZ/ChAdOx-1-S showed no statistically significant differences between volunteers  
590 vaccinated with AVX/COVID-12 or AZ/ChAdOx-1-S (Figure 6).

### 591 **Discussion**

592 The naturally attenuated lentogenic NDV LaSota strain is an avian virus that exhibits  
593 host-range restriction, thereby preventing productive multicycle infection in non-  
594 avian species, including humans. As a live vaccine vector, it has been employed in  
595 the veterinary industry for over 70 years, demonstrating a commendable track record  
596 of safety and efficacy (22). NDV-vectored vaccines have undergone preclinical  
597 studies against various coronaviruses, revealing their safety and immunogenicity in  
598 natural poultry host and non-natural mammalian challenge models (23–25). The  
599 natural attenuation of NDV confers an advantage over other live viral vaccines used  
600 in humans, as it is unlikely to induce disease in humans or any wild or domestic avian  
601 species. Studies have indicated that the introduction of foreign genes into NDV  
602 genomes results in reduced pathogenicity in birds, rather than an increase (26).  
603 Consequently, the NDV-based AVX/COVID-12 does not pose any discernible

604 environmental or agricultural risks (27). Of note, the inserted HexaPro spike protein  
605 is non-functional since its fusion machinery has been disabled by the introduction of  
606 the prolines and by removing the cleavage site between spike subunit 1 and spike  
607 subunit 2.

608 The safety of the AVX/COVID-12 vaccine, administered via IM or IN routes, was  
609 initially confirmed through preclinical tests conducted in pigs (10). This confirmation  
610 was validated in a phase I clinical trial involving volunteers with no prior history of  
611 infection or vaccination (28). Considering that a significant portion of the population  
612 had previously encountered infection or received vaccination at the time of the study,  
613 a subsequent phase II clinical trial was conducted to assess the safety and  
614 immunogenicity of the AVX/COVID-12 vaccine as a heterologous booster dose  
615 through both IM and IN routes. The trial demonstrated that the vaccine retained its  
616 safety and immunogenicity when employed as a booster dose (16). Reports from  
617 clinical trials involving COVID-19 NDV-based vaccines similar to AVX/COVID-12  
618 also indicate that these vaccines are safe and well tolerated in humans (12–15).

619 In this study, we further analyzed the safety and immunogenicity of the AVX/COVID-  
620 12 vaccine as an IM booster in healthy adult volunteers who have gone more than  
621 four months since their last COVID-19 vaccination and/or SARS-CoV-2 infection.  
622 Additionally, a non-inferiority study was conducted using the AZ/ChAdOx-1-S  
623 vaccine as an active control. The safety, immunogenicity, and efficacy of the  
624 intranasal administration of the AVX/COVID-12 vaccine will be investigated in future  
625 studies.

626 The assessment of AEs and their potential association with vaccination was  
627 conducted in 4,056 subjects over a six-month period. Of these, 3,120 received a  
628 single IM dose of the AVX/COVID-12 vaccine, while 936 received the AZ/ChAdOx-  
629 1-S vaccine as an active control. While the use of a placebo during the phase II  
630 stages facilitates a clear definition of the immune response magnitude in subjects  
631 receiving the experimental vaccine, incorporating placebo controls in pharmaceutical  
632 development protocols for COVID-19 vaccines, at the time of this trial, presented an  
633 ethical conflict as vaccines with emergency authorization and national vaccination  
634 plans became available. Consequently, placebo controls were not employed in this  
635 study. Instead, AZ/ChAdOx-1-S as active control was utilized during phase II to  
636 prevent bias in subject distribution and serve as a comparator for assessing the  
637 vaccine's safety. On the other hand, during the phase III stage, the active control  
638 was employed to accurately define biologically relevant non-inferiority and avoid a  
639 potential bio-creep effect (29).

640 The primary vaccine-associated AEs in the phase II-III study were predominantly  
641 mild and associated with the administration site. Few severe AEs were reported, no  
642 statistically significant differences were observed between the two groups, and they  
643 were not related to vaccination. However, regarding the statistically significant  
644 differences, it was found that general reactions and pain at the injection site were

645 more frequent in the AVX/COVID-12 group than in the AZ/ChAdOx-1-S group.  
646 Nevertheless, systemic events were more frequent in the case of the AZ/ChAdOx-  
647 1-S group. It is important to emphasize that there were no statistical differences in  
648 adverse events between the entire population vaccinated with AZ/ChAdOx-1-S or  
649 AVX/COVID-12 (Figure 2A). Furthermore, the nature, incidence, and severity of  
650 adverse events recorded during this study do not indicate any alarming signals  
651 following the administration of the AVX/COVID-12 vaccine. The demonstrated safety  
652 of the AVX/COVID-12 vaccine aligns with the outcomes of earlier clinical phases  
653 (11,16).

654 The findings outlined in this report highlight the immunogenicity of the vaccine,  
655 evidenced by an increase in neutralizing antibody titers, not only against the  
656 ancestral Wuhan-1 strain but also against the Omicron BA.2 and BA.5 variants of  
657 concern (Figure 3). While the neutralizing antibody responses showed an initial  
658 increase at day 14 followed by a gradual decline, it is noteworthy that even after 6  
659 months, antibody titers remained higher compared to pre-boosting levels (Figure 3).  
660 This persistence aligns with observations reported for other COVID-19 vaccines  
661 (30).

662 Furthermore, the analysis of the geometric mean ratio (GMT) of neutralizing  
663 antibodies demonstrated that the AVX/COVID-12 experimental vaccine (GMT ratio:  
664 0.96, CI: 0.85-1.06) met the standard set by the WHO (GMT $\geq$ 0.67) (Table 5) (21),  
665 confirming its non-inferiority when compared to the AZ/ChAdOx-1-S vaccine.

666 The efficacy of the AZ/ChAdOx-1-S vaccine had been previously established in  
667 clinical studies with placebo controls (31). Moreover, primary-series AZ/ChAdOx-1-  
668 S vaccination protects against COVID-19 hospitalization with enduring levels of  
669 vaccine effectiveness through  $\geq$ 6 months, as indicated by consistent results in a  
670 meta-regression analysis. The analysis showed  $\geq$ 80% protection against COVID-19  
671 hospitalization through approximately 43 weeks post-second dose, with a certain  
672 decline (17,18). This vaccine was the most widely used in vaccination campaigns in  
673 Mexico and is the most utilized globally, distributed in 185 countries (2,17).  
674 Therefore, it serves as an excellent active control for the non-inferiority study of the  
675 AVX/COVID-12 vaccine.

676 Further data analysis indicates that a percentage of individuals in both groups did  
677 not seroconvert. Approximately 40% of those vaccinated with both AVX/COVID-12  
678 and AZ/ChadOx-1-S did not seroconvert when measuring response against the  
679 ancestral Wuhan-1 strain, while it was 20% when considering those who did not  
680 seroconvert in response to Wuhan, BA.2, and BA.5 (triple negatives). In other words,  
681 60% seroconverted when measuring the response against the Wuhan-1 strain, and  
682 around 80% seroconverted when considering the response measured against  
683 Wuhan-1 or the BA.2 or BA.5 Omicron strains. This trend was observed in both the  
684 AVX/COVID-12 and AZ/ChadOx-1-S vaccinated groups (Figure 4B).

685 The lack of seroconversion has been reported both in some infected patients (32)  
686 and vaccinated individuals (33), particularly in patients with prior infection, where  
687 seroconversion after receiving a vaccine booster is much lower or non-existent when  
688 neutralizing titers are high due to previous infections (33). In this study, 32% of the  
689 volunteers exhibited anti-N titers (data not shown), indicating prior infection (or  
690 vaccination with inactivated vaccines). Additionally, the study was conducted during  
691 a pandemic peak caused by the Omicron variant (Figure 1S), leading to around 40%  
692 of participants having titers of 1,024 and above at baseline (Figure 4B). The analysis,  
693 comparing baseline titers and the percentage of seroconversion, clearly shows that  
694 higher baseline titers are associated with lower seroconversion, aligning with existing  
695 literature (33).

696 In the case of volunteers who did not seroconvert in both the AVX/COVID-12 and  
697 AZ/ChadOx-1-S boosted groups, it was interestingly observed that the antibody titers  
698 were declining at day 14 (Figure 4B). Further analysis revealed that these volunteers  
699 had very high baseline titers. This phenomenon has been previously reported in  
700 similar cases (33,34), especially in volunteers with high baseline titers receiving  
701 homologous boosters. Additionally, studies in mice have shown that immunization  
702 schemes involving multiple doses lead to a reduced response of neutralizing  
703 antibodies, with a diminished T-cell response, decreased formation of germinal  
704 centers, and cellular response exhaustion (35). This information could contribute to  
705 explaining the observed response in the study patients. It is also crucial to consider  
706 that most of these volunteers had already developed robust hybrid immunity due to  
707 previous vaccinations and infections. Furthermore, the study was conducted during  
708 a peak of Omicron infections (Figure 1S), and undetected exposure to the virus could  
709 have contributed to the observed response. These data indicate that in individuals  
710 with high neutralizing antibody titers, the boosting does not improve the response;  
711 on the contrary, it could not prevent waning in antibody titers. This information is  
712 relevant for planning and deploying vaccination campaigns to maximize the benefits  
713 of vaccination.

714 Nevertheless, the analysis of the volunteers' neutralizing antibody responses  
715 confirmed that the AVX/COVID-12 vaccine meets the WHO non-inferiority standard  
716 compared to the AZ/ChAdOx-1-S vaccine. Individuals with baseline neutralization  
717 titers around 400, boosted either with AVX/COVID-12 or AZ/ChAdOx-1-S, exhibited  
718 a 3 to 4-fold increase in seroconversion for both groups (Figure 4A and 4B). These  
719 results underscore the effectiveness and importance of timely boosting in specific  
720 individuals. It is important to note that this trial included participants regardless of  
721 their initial anti-S IgG titers. The seroconversion observed in volunteers with initially  
722 low antibody titers aligns with phase II clinical trial findings, where participants had  
723 similarly low anti-S IgG titers at the beginning of the study (16). Notably, this phase  
724 II/III study demonstrates that boosting individuals with high neutralizing antibody  
725 titers does not result in a further increase; in fact, it might not stop antibody waning,  
726 though this decline does not reach initial levels as high antibody titers persist.



727 The primary focus of anti-COVID-19 boosting campaigns is on the elderly,  
728 immunocompromised, and individuals with comorbidities. Upon further examination  
729 of neutralizing antibody titers following AVX/COVID-12 or AZ/ChAdOx-1-S boosting,  
730 both vaccines exhibited comparable enhancements in neutralizing antibody titers  
731 among participants with comorbidities, as well as those aged > 65 and < 65 years  
732 (Figure 2S). This data supports the use of these vaccines as boosters in these  
733 populations. Further studies are required to evaluate the safety and immunogenicity  
734 of this vaccine in immunocompromised individuals, pregnant women and kids.

735 With time, the combination of infection and vaccination generates hybrid immunity,  
736 which has been demonstrated to broaden and enhance the neutralizing antibody  
737 and T-cell responses, providing increased protection against infection,  
738 hospitalization, and death (36). This report illustrates the induction of a neutralizing  
739 response against the Omicron variant of concern (VOC) through boosting with  
740 AVX/COVID-12 or AZ/ChAdOx-1-S. Since both vaccines express the spike protein  
741 of the ancestral Wuhan-1 strain, the anti-Omicron neutralizing response may be  
742 attributed to extensively documented cross-reactivity. This phenomenon is  
743 particularly evident in the context of hybrid immunity, which has been shown to  
744 broaden and enhance the response of neutralizing antibodies, not only against the  
745 ancestral variant but also against new variants and other seasonal coronaviruses as  
746 well as SARS-CoV-1 and the Middle East respiratory syndrome coronavirus (MERS  
747 CoV) (33). Given the pandemic status when the trial was conducted, the induction  
748 of antibodies against variants other than Wuhan-1 is not surprising, considering the  
749 large number of T and B cell epitopes shared by the spike proteins from SARS-CoV-  
750 2 variants of concern (37).

751 Regarding the cellular response, an increase in the total CD4+ and CD8+ T cell  
752 responses was observed on day 14 after receiving the booster dose. However, the  
753 increase was statistically significant only for CD8+ cells producing IFN- $\gamma$ . It is  
754 important to note that the data suggest that at the initiation of this study, the  
755 proportions of IFN- $\gamma$ -producing T lymphocytes were relatively high in the participating  
756 subjects, as there is a trend indicating a significant decrease at days 90 and 180.  
757 This trend is also observed for subjects enrolled in the group that received the  
758 AZ/ChAdOx-1-S vaccine, suggesting that, at a population level, due to the active  
759 circulation of the virus, there were initially high baseline levels of T lymphocytes  
760 specific to the SARS-CoV-2 spike protein. While it was possible to detect significant  
761 increases in the specific cellular response to the virus, the high baseline levels  
762 prevented clearer observations of cellular response increases (Figure S1).  
763 Considering the inclusion criteria, which allowed the recruitment of individuals  
764 vaccinated or previously infected with SARS-CoV-2 for four months or more, it is  
765 anticipated that the cellular response would already be elevated (30). This makes it  
766 challenging to observe a distinct increase after the booster. Reports from 2022  
767 estimated that at least 51% of the population had hybrid immunity, with 85%  
768 exhibiting some level of Omicron-induced antibody titers (38). Additional studies

769 propose limited potential for further boosting, notably in individuals initially primed  
770 with infection followed by three mRNA vaccine doses, which maximally induce spike-  
771 specific T-cell responses (39). This report also illustrates that a previous history of  
772 SARS-CoV-2 infection can modify immune responses to the spike protein during  
773 Omicron infection in vaccinated populations. Nevertheless, Omicron infection in  
774 individuals who have received triple vaccinations generally heightens immune  
775 responses to SARS-CoV-2 in both the bloodstream and mucosal regions. This  
776 enhancement potentially fortifies long-lasting population immunity against SARS-  
777 CoV-2 (39). Other studies have indicated that vaccination with BNT162b2, based on  
778 the Wuhan-1 spike protein, and/or breakthrough infection by early Omicron  
779 subvariants elicits CD8+ T cell responses that recognize epitopes within the spike  
780 protein of newly emerging subvariants (40).

781 Collectively, these findings suggest that hybrid immunity acquired from both  
782 vaccination and past infections can prompt notably heightened and broader immune  
783 responses. This combined immunity shows the potential to offer protection against  
784 emerging variants of concern.

785 The evaluation of COVID-19 cases among recipients of AVX/COVID-12 or  
786 AZ/ChAdOx-1-S vaccines revealed no cases of severe disease, with only mild to  
787 moderate disease observed in both groups. An analysis conducted 14 days post-  
788 vaccination indicated a trend towards a lower occurrence of COVID-19 cases in  
789 individuals boosted with AVX/COVID-12 in comparison to the AZ/ChAdOx-1-S  
790 vaccine group, despite the trial not being designed for efficacy analysis.

791 The urgent need persists for the development of safe, effective, and cost-efficient  
792 vaccines against COVID-19, especially for implementing booster campaigns aimed  
793 at vulnerable groups like the elderly, immunocompromised individuals, and those  
794 with comorbidities. This also serves the crucial goal of limiting transmission among  
795 the wider population. The results presented here collectively support the utilization  
796 of the AVX/COVID-12 vaccine to address this pressing need.

## 797 **Conclusions**

798 Our findings demonstrate that the AVX/COVID-12 vaccine is safe, well-tolerated,  
799 and highly immunogenic. It effectively stimulated the production of neutralizing  
800 antibodies against the spike protein from both the ancestral Wuhan-1 strain and the  
801 Omicron variants BA.2 and BA.5. Additionally, at day 14 post-immunization,  
802 AVX/COVID-12 uniquely induced IFN- $\gamma$ -producing CD8+ T cells. Furthermore, a  
803 discernible trend indicated a potentially lower incidence of COVID-19 cases among  
804 volunteers who received the AVX/COVID-12 booster compared to those who  
805 received the AZ/ChAdOx-1-S vaccine, supporting the conclusion of non-inferiority.  
806 Consequently, the AVX/COVID-12 vaccine meets the WHO's non-inferiority  
807 standard when compared to AZ/ChAdOx-1-S. These compelling findings strongly  
808 advocate for the incorporation of the AVX/COVID-12 vaccine as a booster dose for  
809 the general population.

## 810 **Acknowledgments**

811 From CONAHCYT, we acknowledge María Elena Álvarez-Buylla Rocés and Delia  
812 Aideé Orozco Hernández for their role as an inter-institutional liaison and overall  
813 facilitation of proceedings, committee evaluations, sanitary setup, and follow-up of  
814 trial design approvals, evaluations, and progress. We additionally acknowledge the  
815 broader support from various teams within all the clinical research sites and iLS  
816 Clinical Research S.C., particularly Gabriela Rosas, Daniela Castro, Claudia Aguilar,  
817 Roman Jarosch, and Alejandro Arias. From Laboratorio Avi-Mex, S. A. de C. V., we  
818 acknowledge the following people for their operative support: Bernardo Lozano  
819 Alcántara, Alejandro Ruiz, Rosalba Rodríguez, Leticia Espinosa Gervasio, Rodrigo  
820 Yebra Reyes, Vanessa Escamilla Jiménez, Jaime Becerra Jiménez, Lorena Juárez  
821 Pedraza, Sandra Yuridia Ang Tinajero, Avelia Ariadna Cuevas Cifuentes, Juan  
822 Pablo Robles Álvarez, Avirán Almazán Gutiérrez, Aurora Betsabé Gutiérrez  
823 Balderas, Merlenne Rubio Díaz, and Guadalupe Aguilar Rafael. From INER, we  
824 acknowledge the following people for their technical support: Liliana Figueroa  
825 Hernández, Francisco Cruz Flores, Claudia Ivett Hernández Lazaro, María Angelica  
826 Velázquez González, Jessica Romero Rodríguez, Dulce Cinthia Soriano  
827 Hernández, Milton Nieto Ponce, Edgar Reyna, Itzel Corona, José E. Marquez,  
828 Angelica Moncada, and Pablo Franco-Mendoza. From IMSS, we acknowledge the  
829 help of Diego Lozano-Cisneros in formatting the manuscript. From the Icahn School  
830 of Medicine at Mount Sinai, we acknowledge Sean Whelan. From Instituto  
831 Politécnico Nacional, Escuela Nacional de Ciencias Biológicas, we acknowledge  
832 Sonia Mayra Pérez Tapia, Alexis Gabriel Suárez Gómez, and Sandra Comparan  
833 Alarcón.

834 **Funding:** The funding for the clinical study was provided by the National Council for  
835 Humanities, Science and Technology (CONAHCYT, México), except for all the  
836 production and vaccine product supply, which was funded solely by Laboratorio Avi-  
837 Mex, S. A. de C. V. (Avimex). CONAHCYT did not participate in the trial design but  
838 did evaluate it and approved the project through their National Committee for  
839 Science, Technology and Innovation in Public Health. Funding was managed by  
840 Avimex and used to pay for all laboratory tests, clinical sites, and clinical  
841 professionals. CONAHCYT also facilitated the identification, purchase, and  
842 importation of certain supplies and the communication with other entities of the  
843 Federal Mexican Government to facilitate the study.

844 **Conflict of Interest:** The vaccine candidate administered in this study was  
845 developed by faculty members at the Icahn School of Medicine at Mount Sinai  
846 including P.P., F.K. and A.G.-S. Mount Sinai is seeking to commercialize this  
847 vaccine; therefore, the institution and its faculty inventors could benefit financially.  
848 The Icahn School of Medicine at Mount Sinai has filed patent applications relating to  
849 SARS-CoV-2 serological assays (USA Provisional Application Numbers:  
850 62/994,252, 63/018,457, 63/020,503, and 63/024,436) and NDV-based SARS-CoV-  
851 2 vaccines (USA Provisional Application Number: 63/251,020) which list FK as co-

852 inventor. A.G.-S. and P.P. are a co-inventor in the NDV-based SARS-CoV-2 vaccine  
853 patent application. Patent applications were submitted by the Icahn School of  
854 Medicine at Mount Sinai. Mount Sinai has spun out a company, Kantaro, to market  
855 serological tests for SARS-CoV-2 and another company, CastleVax, to  
856 commercialize SARS-CoV-2 vaccines. F.K., P.P. and A.G.-S. serve on the scientific  
857 advisory board of CastleVax and are listed as co-founders of the company. F.K. has  
858 consulted for Merck, Seqirus, Curevac, and Pfizer, and is currently consulting for  
859 Gritstone, Third Rock Ventures, GSK, and Avimex. The F.K. laboratory has been  
860 collaborating with Pfizer on animal models of SARS-CoV-2. C.L.-M. has consulted  
861 for AstraZeneca. The A.G.-S. laboratory has received research support from GSK,  
862 Pfizer, Senhwa Biosciences, Kenall Manufacturing, Blade Therapeutics, Avimex,  
863 Johnson & Johnson, Dynavax, 7Hills Pharma, Pharmamar, ImmunityBio, Accurius,  
864 Nanocomposix, Hexamer, N-fold LLC, Model Medicines, Atea Pharma, Applied  
865 Biological Laboratories and Merck. A.G.-S. has consulting agreements for the  
866 following companies involving cash and/or stock: Amovir, Vivaldi Biosciences,  
867 Contrafect, 7Hills Pharma, Avimex, Pagoda, Accurius, Esperovax, Farmak, Applied  
868 Biological Laboratories, Pharmamar, CureLab Oncology, CureLab Veterinary,  
869 Synairgen, Paratus, Pfizer and Prosetta. A.G.-S. has been an invited speaker in  
870 meeting events organized by Seqirus, Janssen, Abbott, and AstraZeneca. P.P. has  
871 a consulting agreement with Avimex.

872 Members of Avimex developed the live vaccine used in this study. Avimex filed  
873 patent applications with Mount Sinai and CONAHCYT. M.T., D.S.-M., C.L.-M.,  
874 H.E.C.-C., F.C.-P., G.P.D.L., and B.L.-D. are named as inventors on at least one of  
875 those patent applications. The clinical study was entirely performed in Mexico and  
876 Mount Sinai had no role in the clinical study. The rest of the participants are  
877 employees of their corresponding institutions and declare no competing interests.

878 **Ethical Responsibilities:** The protocol was approved by the ethics, research, and  
879 biosafety committees of each clinical research site, National Committee for Science,  
880 Technology and Innovation in Public Health of the National Council for Humanities,  
881 Science, and Technology (CONAHCYT), and also by the Federal Commission for  
882 the Protection against Sanitary Risks (COFEPRIS, Mexico) as a regulatory agency.

883 **Protection of Humans and Animals:** No animals were used in this study. The  
884 protocol was designed to comply with the ethical principles of the Helsinki  
885 Declaration, Good Clinical Practices, and the applicable Mexican law.

886 **Data Confidentiality and Sharing:** The protocol was registered in the National  
887 Registry of Clinical Studies under number RNEC2022-AVXSARSCoV2VAC005 and  
888 published under NCT05710783. Individual de-identified participant data will not be  
889 shared beyond the limits permitted by the informed consent and Mexican law.  
890 Specifically, this includes the sharing of the study protocol, statistical analysis plan,  
891 informed consent form, and approved clinical study report. Additionally, other de-  
892 identified data allowed under the informed consent and Mexican law may be shared.

893 The data will be made available immediately upon publication and for 12 months  
894 thereafter. Access to the data will be granted solely to investigators with  
895 methodologically sound proposals, subject to authorization by an independent  
896 review committee and the ethics committees involved in approving the protocol. If  
897 required by law, authorization from the Federal Commission for the Protection  
898 against Sanitary Risks (COFEPRIS) in Mexico will also be obtained. Any use of the  
899 data must strictly adhere to the authorized purposes outlined during the approval  
900 process.

901 **Privacy Rights and Informed Consent:** Informed Consent formats were provided  
902 and signed by all participants under Good Clinical Practices and Mexican law.  
903 Personal data is confidential, and subjects are not identified personally. Their data  
904 was analyzed and duly de-identified.

## 905 **References**

- 906 1. WHO Coronavirus (COVID-19) Dashboard | WHO Coronavirus (COVID-19)  
907 Dashboard With Vaccination Data [Internet]. [cited 2023 Jan 5]. Available  
908 from: <https://covid19.who.int/>
- 909 2. Coronavirus Pandemic (COVID-19) - Our World in Data [Internet]. [cited  
910 2023 Nov 15]. Available from: <https://ourworldindata.org/coronavirus>
- 911 3. COVID19 Vaccine Tracker [Internet]. [cited 2023 Nov 15]. Available from:  
912 <https://covid19.trackvaccines.org/>
- 913 4. Cheng H, Peng Z, Luo W, Si S, Mo M, Zhou H, et al. Efficacy and safety of  
914 covid-19 vaccines in phase iii trials: A meta-analysis. *Vaccines* [Internet].  
915 2021 Jun 1 [cited 2023 Nov 15];9(6). Available from:  
916 </pmc/articles/PMC8228087/>
- 917 5. Global Dashboard for Vaccine Equity - UNDP Data Futures Platform  
918 [Internet]. [cited 2023 Jan 5]. Available from: [https://data.undp.org/vaccine-](https://data.undp.org/vaccine-equity/)  
919 [equity/](https://data.undp.org/vaccine-equity/)
- 920 6. Seephetdee C, Buasri N, Bhukhai K, Srisanga K, Manopwisedjaroen S,  
921 Lertjintanakit S, et al. Mice immunized with the vaccine candidate hexapro  
922 spike produce neutralizing antibodies against sars-cov-2. *Vaccines*.  
923 2021;9(5):1–9.
- 924 7. Hsieh CL, Goldsmith JA, Schaub JM, DiVenere AM, Kuo HC, Javanmardi K,  
925 et al. Structure-based design of prefusion-stabilized SARS-CoV-2 spikes.  
926 *Science* [Internet]. 2020 Sep 1 [cited 2023 Nov 15];369(6510):1501–5.  
927 Available from: <https://pubmed.ncbi.nlm.nih.gov/32703906/>
- 928 8. Sun W, Liu Y, Amanat F, González-Domínguez I, McCroskery S, Slamaniq  
929 S, et al. A Newcastle disease virus expressing a stabilized spike protein of  
930 SARS-CoV-2 induces protective immune responses. *Nat Commun* 2021 121  
931 [Internet]. 2021 Oct 27 [cited 2023 Jan 5];12(1):1–14. Available from:  
932 <https://www.nature.com/articles/s41467-021-26499-y>



- 933 9. Park JG, Oladunni FS, Rohaim MA, Whittingham-Dowd J, Tollitt J, Hodges  
934 MDJ, et al. Immunogenicity and protective efficacy of an intranasal live-  
935 attenuated vaccine against SARS-CoV-2. *iScience* [Internet].  
936 2021;24(9):102941. Available from:  
937 <https://doi.org/10.1016/j.isci.2021.102941>
- 938 10. Lara-Puente JH, Carreño JM, Sun W, Suárez-Martínez A, Ramírez-Martínez  
939 L, Quezada-Monroy F, et al. Safety and Immunogenicity of a Newcastle  
940 Disease Virus Vector-Based SARS-CoV-2 Vaccine Candidate, AVX/COVID-  
941 12-HEXAPRO (Patria), in Pigs. *MBio* [Internet]. 2021 Oct 1 [cited 2023 Jan  
942 5];12(5). Available from: <https://pubmed.ncbi.nlm.nih.gov/34544278/>
- 943 11. Ponce-de-León S, Torres M, Soto-Ramírez LE, Calva JJ, Santillán-Doherty  
944 P, Carranza-Salazar DE, et al. Interim safety and immunogenicity results  
945 from an NDV-based COVID-19 vaccine phase I trial in Mexico. *npj Vaccines*  
946 [Internet]. 2023;8(1):67. Available from: [https://doi.org/10.1038/s41541-023-](https://doi.org/10.1038/s41541-023-00662-6)  
947 [00662-6](https://doi.org/10.1038/s41541-023-00662-6)
- 948 12. Duc Dang A, Dinh Vu T, Hai Vu H, Thanh Ta V, Thi Van Pham A, Thi Ngoc  
949 Dang M, et al. Safety and immunogenicity of an egg-based inactivated  
950 Newcastle disease virus vaccine expressing SARS-CoV-2 spike: Interim  
951 results of a randomized, placebo-controlled, phase 1/2 trial in Vietnam.  
952 *Vaccine* [Internet]. 2022 Jun 9 [cited 2023 Nov 15];40(26):3621–32. Available  
953 from: <https://pubmed.ncbi.nlm.nih.gov/35577631/>
- 954 13. Pitisuttithum P, Luvira V, Lawpoolsri S, Muangnoicharoen S, Kamolratanakul  
955 S, Sivakorn C, et al. Safety and immunogenicity of an inactivated  
956 recombinant Newcastle disease virus vaccine expressing SARS-CoV-2  
957 spike: Interim results of a randomised, placebo-controlled, phase 1 trial.  
958 *EClinicalMedicine* [Internet]. 2022 Mar 1 [cited 2023 Nov 15];45. Available  
959 from: <https://pubmed.ncbi.nlm.nih.gov/35284808/>
- 960 14. Pitisuttithum P, Luvira V, Lawpoolsri S, Muangnoicharoen S, Kamolratanakul  
961 S, Sivakorn C, et al. Safety and Immunogenicity of an Inactivated  
962 Recombinant Newcastle Disease Virus Vaccine Expressing SARS-CoV-2  
963 Spike: Interim Results of a Randomised, Placebo-Controlled, Phase 1/2  
964 Trial. *medRxiv* [Internet]. 2021 Sep 22 [cited 2023 Nov  
965 15];2021.09.17.21263758. Available from:  
966 <https://www.medrxiv.org/content/10.1101/2021.09.17.21263758v2>
- 967 15. องค์การเภสัชกรรม (อภ.) the Government Pharmaceutical Organization (GPO)  
968 Thailand [Internet]. [cited 2024 Jan 29]. Available from:  
969 <https://www.gpo.or.th/view/1029>
- 970 16. Constantino López-Macías, Martha Torres, Brenda Armenta-Copca, Niels  
971 Wachter, Laura Castro-Castrezana, Andrea Alicia Colli-Domínguez, Tania  
972 Rivera-Hernández, Alejandro Torres-Flores, Luis Ramírez-Martínez,  
973 Georgina Paz-De la Rosa, Oscar Rojas and BL-D. A Phase II Study  
974 Integrating a Single-Blind Safety Phase with a Double-Blind, Placebo-

- 975 Controlled Randomized Phase, Assessing Single-Dose Intramuscular or  
976 Intranasal Administration to Evaluate the Safety and Immunogenicity of the  
977 Recombinant Vaccine Against. Manuscr Submitt medRxiv. 2024;
- 978 17. Abdel-Qader DH, Abdel-Qader H, Silverthorne J, Kongkaew C, Meslamani  
979 AZA, Hayajneh W, et al. Real-World Effectiveness of Four Types of COVID-  
980 19 Vaccines. *Vaccines* [Internet]. 2023 May 1 [cited 2023 Nov 15];11(5).  
981 Available from: <https://pubmed.ncbi.nlm.nih.gov/37243089/>
- 982 18. Meeraus W, de Munter L, Gray CM, Dwivedi A, Wyndham-Thomas C,  
983 Ouwens M, et al. Protection against COVID-19 hospitalisation conferred by  
984 primary-series vaccination with AZD1222 in non-boosted individuals: first  
985 vaccine effectiveness results of the European COVIDRIVE study and meta-  
986 regression analysis. *Lancet Reg Heal - Eur*. 2023 Aug 1;31:100675.
- 987 19. Covid World Vaccination Tracker - The New York Times [Internet]. [cited  
988 2023 Nov 15]. Available from:  
989 [https://www.nytimes.com/interactive/2021/world/covid-vaccinations-](https://www.nytimes.com/interactive/2021/world/covid-vaccinations-tracker.html)  
990 [tracker.html](https://www.nytimes.com/interactive/2021/world/covid-vaccinations-tracker.html)
- 991 20. COVID-19: dosis confirmadas de vacunas en México 2021 | Statista  
992 [Internet]. [cited 2023 Nov 15]. Available from:  
993 [https://es.statista.com/estadisticas/1207394/dosis-confirmadas-vacunas-](https://es.statista.com/estadisticas/1207394/dosis-confirmadas-vacunas-covid-mexico/)  
994 [covid-mexico/](https://es.statista.com/estadisticas/1207394/dosis-confirmadas-vacunas-covid-mexico/)
- 995 21. Guidelines on clinical evaluation of vaccines: regulatory expectations, Annex  
996 1 , TRS No 924 [Internet]. [cited 2023 Nov 15]. Available from:  
997 [https://www.who.int/publications/m/item/guidelines-on-clinical-evaluation-of-](https://www.who.int/publications/m/item/guidelines-on-clinical-evaluation-of-vaccines-regulatory-expectations)  
998 [vaccines-regulatory-expectations](https://www.who.int/publications/m/item/guidelines-on-clinical-evaluation-of-vaccines-regulatory-expectations)
- 999 22. Samal SK. Newcastle disease virus. *Avian Virol Res Futur Trends*, 1st ed;  
1000 Samal, SK, Ed. 2019;43–85.
- 1001 23. DiNapoli JM, Kotelkin A, Yang L, Elankumaran S, Murphy BR, Samal SK, et  
1002 al. Newcastle disease virus, a host range-restricted virus, as a vaccine vector  
1003 for intranasal immunization against emerging pathogens. *Proc Natl Acad Sci*  
1004 *U S A* [Internet]. 2007 Jun 5 [cited 2023 Nov 15];104(23):9788–93. Available  
1005 from: <https://pubmed.ncbi.nlm.nih.gov/17535926/>
- 1006 24. LIU R qiang, GE J ying, WANG J ling, SHAO Y, ZHANG H lei, WANG J  
1007 liang, et al. Newcastle disease virus-based MERS-CoV candidate vaccine  
1008 elicits high-level and lasting neutralizing antibodies in Bactrian camels. *J*  
1009 *Integr Agric JIA* [Internet]. 2017 Oct 1 [cited 2023 Nov 15];16(10):2264–73.  
1010 Available from: <https://pubmed.ncbi.nlm.nih.gov/32288953/>
- 1011 25. Shirvani E, Paldurai A, Manoharan VK, Varghese BP, Samal SK. A  
1012 Recombinant Newcastle Disease Virus (NDV) Expressing S Protein of  
1013 Infectious Bronchitis Virus (IBV) Protects Chickens against IBV and NDV. *Sci*  
1014 *Rep* [Internet]. 2018 Dec 1 [cited 2023 Nov 15];8(1). Available from:  
1015 <https://pubmed.ncbi.nlm.nih.gov/30097608/>

- 1016 26. Park M-S, Steel J, García-Sastre A, Swayne D, Palese P. Engineered viral  
1017 vaccine constructs with dual specificity: Avian influenza and Newcastle  
1018 disease. *Proc Natl Acad Sci [Internet]*. 2006 May 23;103(21):8203–8.  
1019 Available from: <https://doi.org/10.1073/pnas.0602566103>
- 1020 27. Shirvani E, Samal SK. Newcastle Disease Virus as a Vaccine Vector for  
1021 SARS-CoV-2. *Pathog (Basel, Switzerland) [Internet]*. 2020 Aug 1 [cited 2023  
1022 Nov 15];9(8):1–8. Available from: <https://pubmed.ncbi.nlm.nih.gov/32751194/>
- 1023 28. Ponce-de-León S, Torres M, Soto-Ramírez LE, Calva JJ, Santillán-Doherty  
1024 P, Carranza-Salazar DE, et al. Safety and immunogenicity of a live  
1025 recombinant Newcastle disease virus-based COVID-19 vaccine (Patria)  
1026 administered via the intramuscular or intranasal route: Interim results of a  
1027 non-randomized open label phase I trial in Mexico. *medRxiv [Internet]*. 2022  
1028 Feb 9 [cited 2023 Nov 15];7–127. Available from:  
1029 </pmc/articles/PMC8845421/>
- 1030 29. Everson-Stewart S, Emerson SS. Bio-creep in non-inferiority clinical trials.  
1031 *Stat Med [Internet]*. 2010 Nov [cited 2023 Nov 15];29(27):2769–80. Available  
1032 from: <https://pubmed.ncbi.nlm.nih.gov/20809482/>
- 1033 30. Guerrera G, Picozza M, D’Orso S, Placido R, Pirronello M, Verdiani A, et al.  
1034 BNT162b2 vaccination induces durable SARS-CoV-2-specific T cells with a  
1035 stem cell memory phenotype. *Sci Immunol [Internet]*. 2023 Jul  
1036 12;6(66):eab15344. Available from:  
1037 <https://doi.org/10.1126/sciimmunol.ab15344>
- 1038 31. Voysey M, Clemens SAC, Madhi SA, Weckx LY, Folegatti PM, Aley PK, et  
1039 al. Safety and efficacy of the ChAdOx1 nCoV-19 vaccine (AZD1222) against  
1040 SARS-CoV-2: an interim analysis of four randomised controlled trials in  
1041 Brazil, South Africa, and the UK. *Lancet*. 2021;397(10269):99–111.
- 1042 32. Figueiredo-Campos P, Blankenhau B, Mota C, Gomes A, Serrano M, Ariotti  
1043 S, et al. Seroprevalence of anti-SARS-CoV-2 antibodies in COVID-19  
1044 patients and healthy volunteers up to 6 months post disease onset. *Eur J  
1045 Immunol [Internet]*. 2020 Dec 1 [cited 2023 Nov 15];50(12):2025–40.  
1046 Available from: <https://onlinelibrary.wiley.com/doi/full/10.1002/eji.202048970>
- 1047 33. Payne RP, Longet S, Austin JA, Skelly DT, Dejnirattisai W, Adele S, et al.  
1048 Immunogenicity of standard and extended dosing intervals of BNT162b2  
1049 mRNA vaccine. *Cell [Internet]*. 2021 Nov 11 [cited 2023 Nov  
1050 15];184(23):5699-5714.e11. Available from:  
1051 <https://pubmed.ncbi.nlm.nih.gov/34735795/>
- 1052 34. Costa Clemens SA, Weckx L, Clemens R, Almeida Mendes AV, Ramos  
1053 Souza A, Silveira MBV, et al. Heterologous versus homologous COVID-19  
1054 booster vaccination in previous recipients of two doses of CoronaVac  
1055 COVID-19 vaccine in Brazil (RHH-001): a phase 4, non-inferiority, single  
1056 blind, randomised study. *Lancet (London, England) [Internet]*. 2022 Feb 5  
1057 [cited 2023 Nov 15];399(10324):521–9. Available from:

- 1058 <https://pubmed.ncbi.nlm.nih.gov/35074136/>
- 1059 35. Gao FX, Wu RX, Shen MY, Huang JJ, Li TT, Hu C, et al. Extended SARS-  
1060 CoV-2 RBD booster vaccination induces humoral and cellular immune  
1061 tolerance in mice. *iScience* [Internet]. 2022 Dec 22 [cited 2023 Nov  
1062 15];25(12):105479. Available from:  
1063 <http://www.cell.com/article/S2589004222017515/fulltext>
- 1064 36. Altarawneh HN, Chemaitelly H, Ayoub HH, Tang P, Hasan MR, Yassine HM,  
1065 et al. Effects of Previous Infection and Vaccination on Symptomatic Omicron  
1066 Infections. *N Engl J Med* [Internet]. 2022 Jul 7 [cited 2023 Nov  
1067 15];387(1):21–34. Available from:  
1068 <https://pubmed.ncbi.nlm.nih.gov/35704396/>
- 1069 37. Pacheco-Olvera DL, Saint Remy-Hernández S, García-Valeriano MG,  
1070 Rivera-Hernández T, López-Macías C. Bioinformatic Analysis of B- and T-  
1071 cell Epitopes from SARS-CoV-2 Structural Proteins and their Potential  
1072 Cross-reactivity with Emerging Variants and other Human Coronaviruses.  
1073 *Arch Med Res* [Internet]. 2022 Nov 1 [cited 2024 Jan 19];53(7):694–710.  
1074 Available from: <https://pubmed.ncbi.nlm.nih.gov/36336501/>
- 1075 38. Frei A, Kaufmann M, Amati R, Dettwiler AB, Wyl V von, Annoni AM, et al.  
1076 Development of hybrid immunity during a period of high incidence of  
1077 infections with Omicron subvariants: A prospective population based multi-  
1078 region cohort study. *medRxiv* [Internet]. 2022 Oct 17 [cited 2023 Nov  
1079 15];2022.10.14.22281076. Available from:  
1080 <https://www.medrxiv.org/content/10.1101/2022.10.14.22281076v1>
- 1081 39. Hornsby H, Nicols AR, Longet S, Liu C, Tomic A, Angyal A, et al. Omicron  
1082 infection following vaccination enhances a broad spectrum of immune  
1083 responses dependent on infection history. *Nat Commun* 2023 141 [Internet].  
1084 2023 Aug 21 [cited 2023 Nov 15];14(1):1–16. Available from:  
1085 <https://www.nature.com/articles/s41467-023-40592-4>
- 1086 40. Kim SH, Kim J, Jung S, Noh JY, Kim J, Park H, et al. Omicron BA.2  
1087 breakthrough infection elicits CD8+ T cell responses recognizing the spike of  
1088 later Omicron subvariants. *Sci Immunol*. 2024;9(91):eade6132.
- 1089

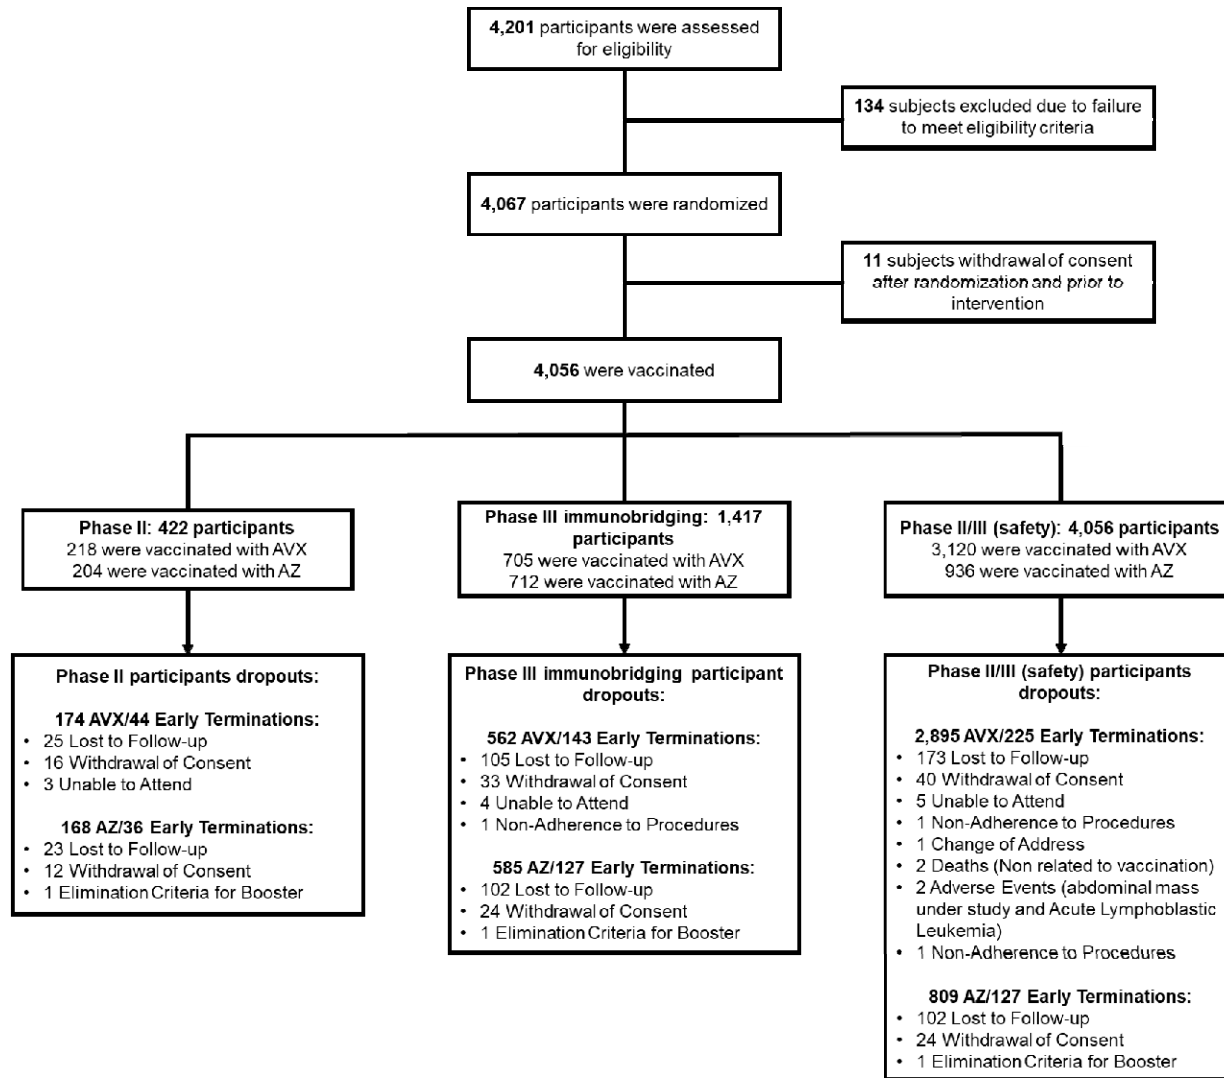

**Figure 1. Participant Screening and Randomization.** A flowchart illustrating the screening, randomization, and distribution of participants among different experimental groups throughout the study.



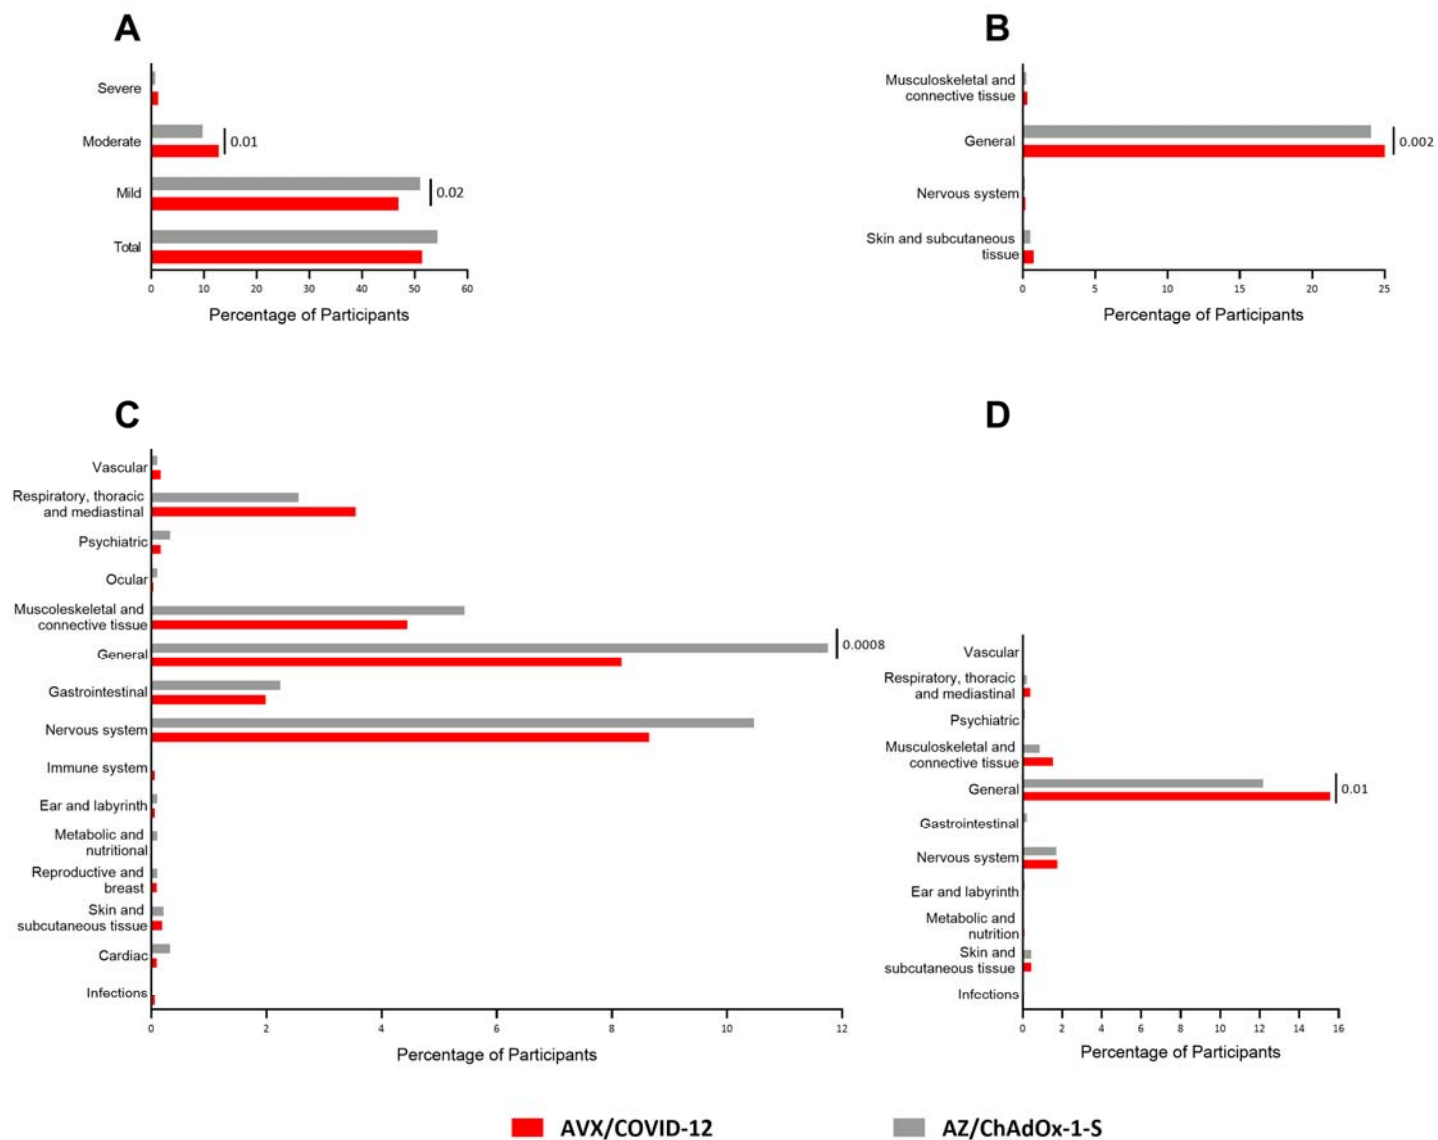

**Figure 2. Local and systemic adverse events 7 days after boosting with AVX/COVID-12 or ChAdOx-1-S.** Compilation of clinical data and adverse events in participants following boosting with AVX/COVID-12 or ChAdOx-1-S vaccines. A) Percentage of participants affected by adverse events classified by severity; B) participants affected by local adverse events of special interest; C) participants affected by systemic adverse events of special interest, and D) participants affected by adverse events with a confirmed relation to the vaccine according to the investigator's criteria. The analyzed disorders are listed in supplementary tables 1 and 2. p-values were calculated through a comparison of proportions using the Z-test. Statistically significant differences were observed with p-values:  $p \leq 0.05$ .

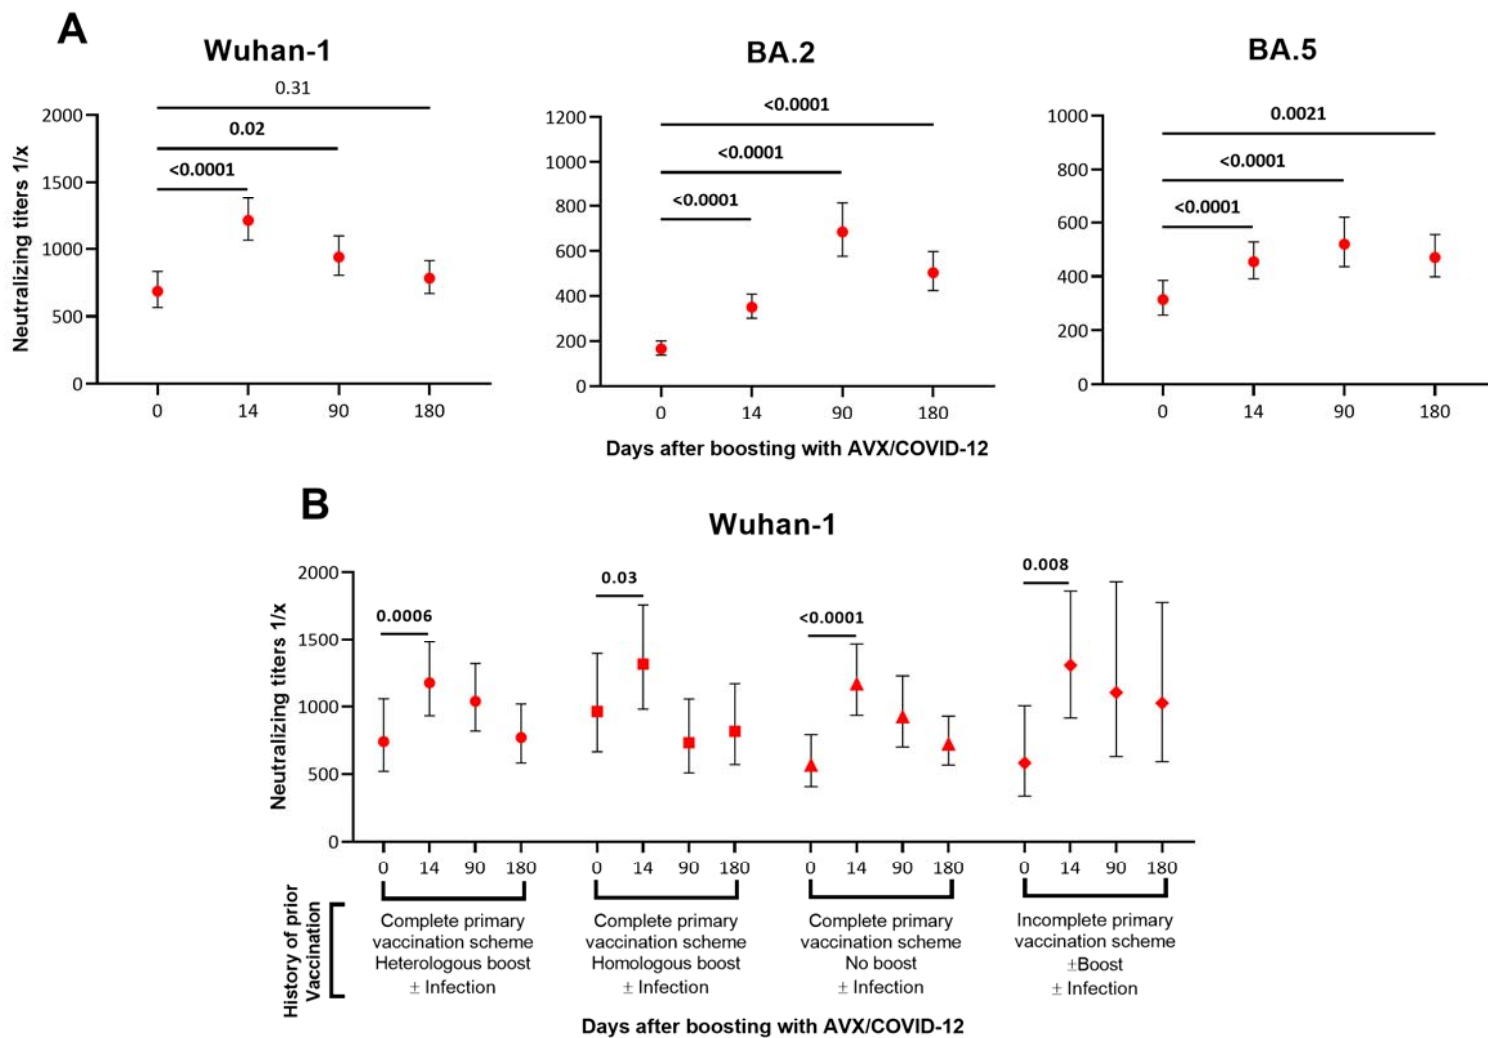

**Figure 3. AVX/COVID-12 boosting induced neutralizing antibody titers against ancestral Wuhan-1 and Omicron SARS-CoV-2 variants of concern.** Assessment of neutralizing antibody titers in sera from AVX/COVID-12 boosted volunteers against the S protein using the pseudovirus neutralization assay. A) Anti- SARS-CoV-2 antibody titers against Wuhan-1 or Omicron (BA.2 and BA.5) variants of concern. B) Specific neutralizing antibody titers against Wuhan-1 strain in participants with different history of immunization and infection induced by AVX/COVID-12 vaccine boost. Homologous boost refers to the use of the same vaccine platform used for the primary series vaccination; heterologous boost refers to the use a different vaccine platform used for the primary series vaccination. ± Infection groups includes infected and non-infected participants. The limit of detection is 60, although it is not specified in the graph. Dots represent the geometric mean, while bars indicate the 95% confidence intervals for the error. The p-values from the statistical analysis are presented in bold numbers, where  $p > 0.05$  is considered statistically significant. A paired t-test was employed to compare neutralizing titers.

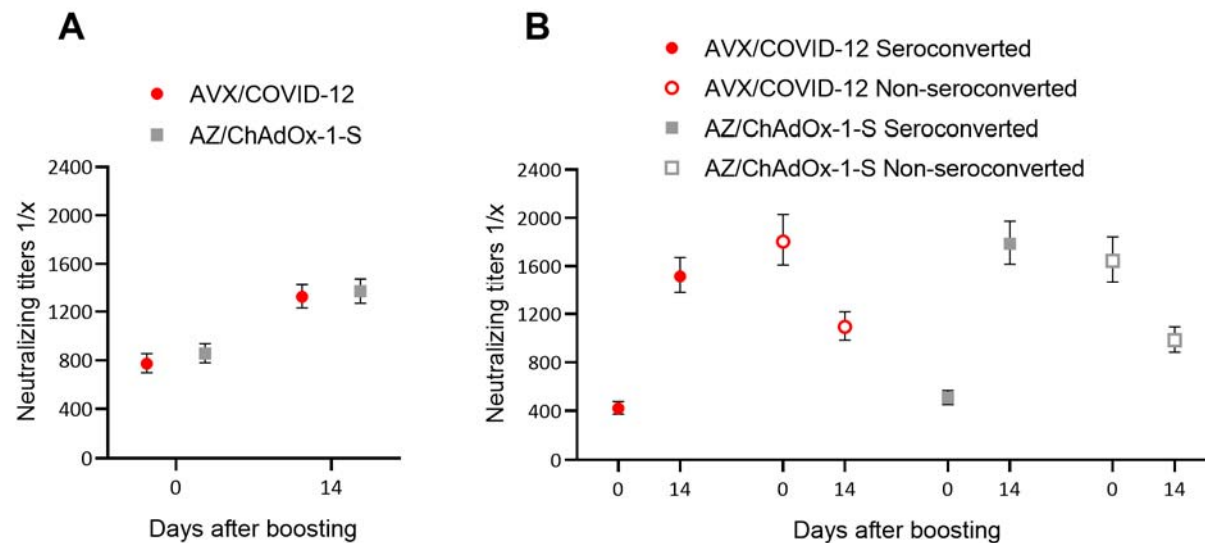

**Figure 4. Similar neutralizing antibody responses were observed in participants who received booster doses of AVX/COVID-12 or AZ/ChAdOx-1-S.** Analysis of neutralizing antibody titers against Wuhan-1 strain in participants boosted with AVX/COVID-12

(red circles) or AZ/ChAdOX-1-S (gray squares): A) Antibody titers in all boosted subjects on days 0 and 14 and B) comparison between participants who seroconverted (closed symbols) and subjects who did not seroconverted (open symbols). No statistically significant differences were observed, with  $p > 0.05$  considered as the threshold for statistical significance.



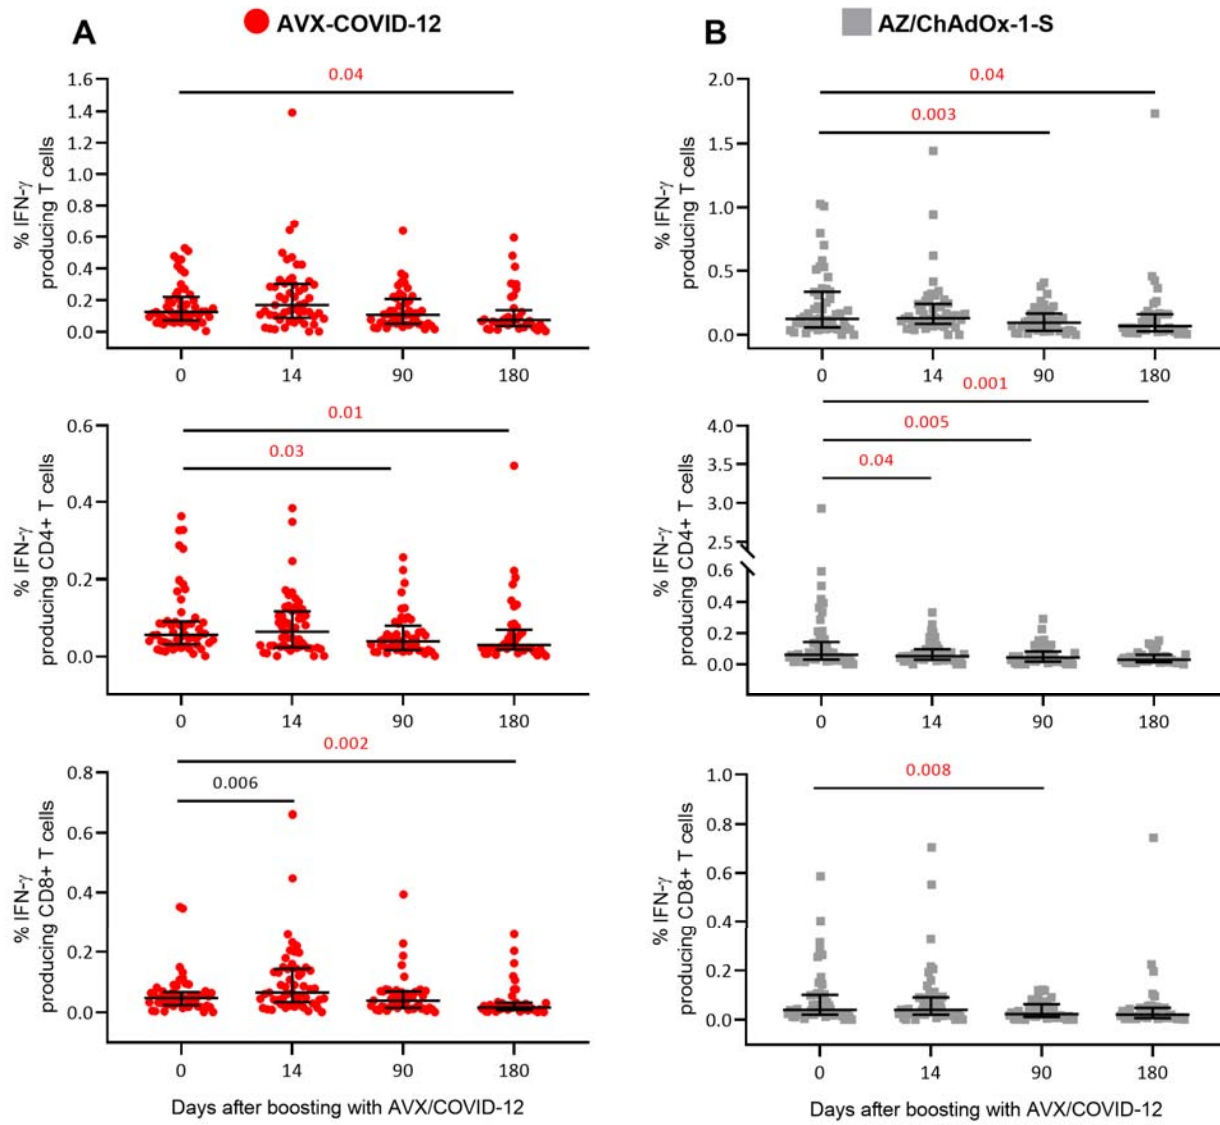

**Figure 5: T cell responses in participants vaccinated with AVX/COVID-12 or AZ/ChAdOx-1-S vaccines.** A) Percentage of IFN- $\gamma$ -producing total, CD4+ and CD8+ T cells from peripheral blood mononuclear cells collected from participants who received booster doses of AVX/COVID-12 or B) AZ/ChAdOx-1-S vaccines. The cells were stimulated with the subunit 1 of spike protein, and the production of IFN- $\gamma$  was assessed using flow cytometry. The limit of detection (LoD) of the % IFN- $\gamma$  producing total T cells is 0.006, % IFN- $\gamma$  producing CD4+ T cells is 0.006 and % IFN- $\gamma$  producing CD8+ T cells is 0.006. The graph shows individual value. Bars shows geometric Mean, and the error shows the 95% confidence intervals. Statistically significant increases are depicted in black; this was observed only in IFN- $\gamma$ -producing T cells from participants vaccinated with AVX/COVID-12. Statistically significant differences with decreases are shown in red. p-values:  $p \leq 0.05$  for intragroup comparisons using the Wilcoxon Friedman signed-rank test.

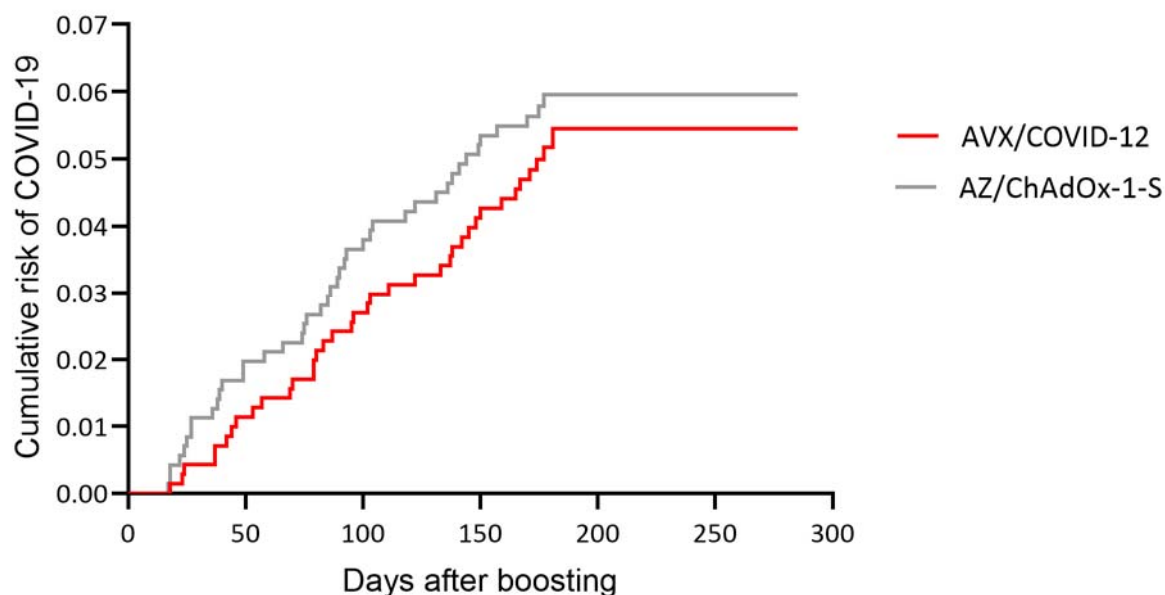

**Figure 6. The incidence of COVID-19 cases showed no statistically significant difference between the participants vaccinated with AVX/COVID-12 or AZ/ChAdOx-1-S.** Comparison of Nelson-Aalen cumulative hazard incidence curves for COVID-19 cases reported during the 180 days after boosting with AVX/COVID-12 or AZ/ChAdOx-1-S.

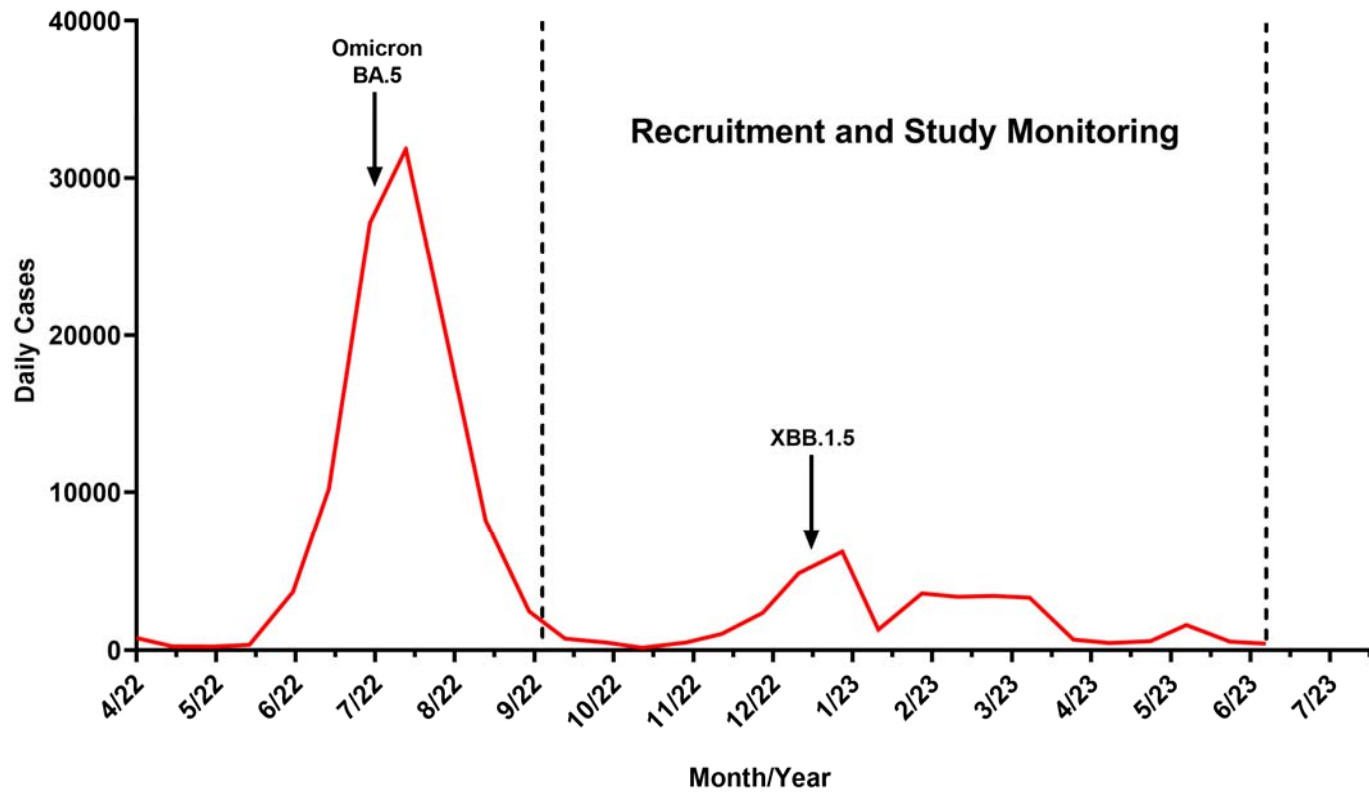

Supplementary Figure 1. COVID-19 incidence in Mexico during the recruitment and monitoring of the study participants.

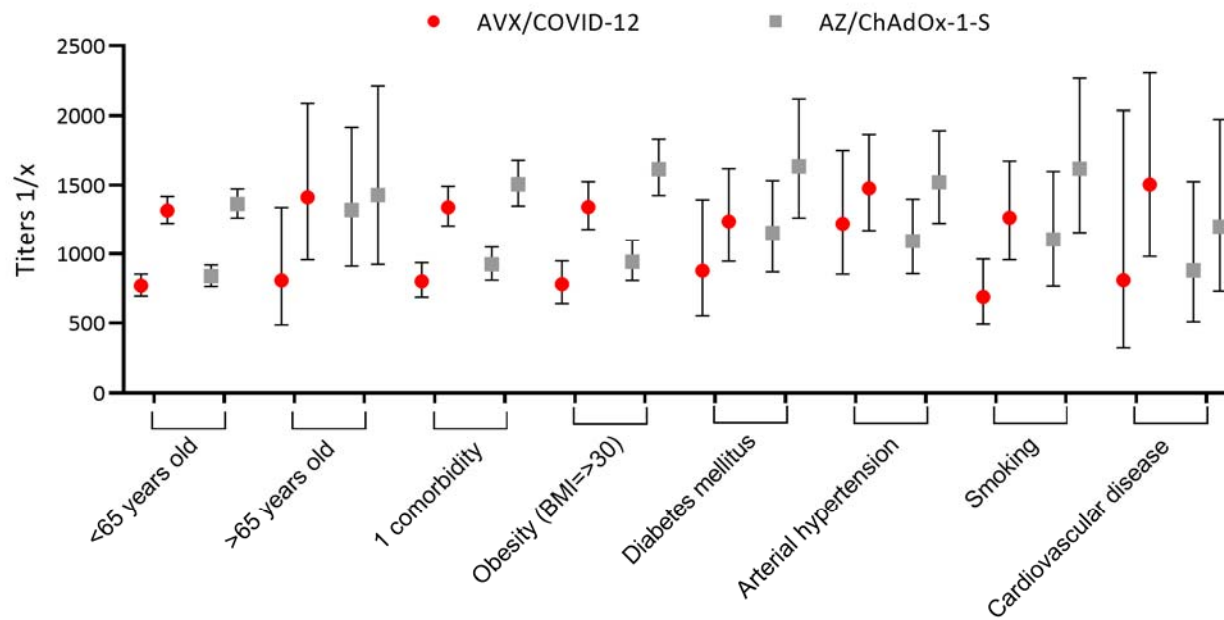

**Supplementary Figure 2. AVX/COVID-12 and AZ/ChAdOx-1-S Boosting Elicited Comparable Increases in Neutralizing Antibody Titers Among Participants with Comorbidities, as well as in Subjects >65 and <65 Years Old.** The geometric mean and confidence interval for antibody titers at day 0 and day 14 are displayed for AVX/COVID-12 (red circles) and AZ/ChAdOx-1-S (gray squares). Both vaccines exhibited comparable rises in neutralizing antibody titers among participants with comorbidities and in those aged >65 and <65 years old.

## Tables

**Table 1.** Phase II/III demographic characteristics

| n (%)                                 | AVX<br>3120 | AZ<br>936   |
|---------------------------------------|-------------|-------------|
| <b>Age, mean (SD)</b>                 | 39.8 (15.2) | 39.6 (14.6) |
| <b>Age groups</b>                     |             |             |
| < 20 years old                        | 116 (3.7)   | 43 (4.5)    |
| 20 - 29 years old                     | 903 (28.9)  | 264 (28.2)  |
| 30 - 39 years old                     | 622 (19.9)  | 180 (19.2)  |
| 40 - 49 years old                     | 612 (19.6)  | 189 (20.1)  |
| 50 - 59 years old                     | 496 (15.9)  | 163 (17.4)  |
| 60 - 69 years old                     | 260 (8.3)   | 78 (8.3)    |
| 70 - 79 years old                     | 97 (3.1)    | 16 (1.7)    |
| 80 and more                           | 14 (0.4)    | 3 (0.3)     |
| <b>Gender, n (%)</b>                  |             |             |
| Male                                  | 1430 (45.8) | 440 (47)    |
| Female                                | 1690 (54.2) | 496 (53)    |
| <b>BMI, mean (SD)</b>                 | 28 (5.3)    | 28.6 (5.5)  |
| <b>BMI classification</b>             |             |             |
| Underweight                           | 32 (1)      | 9 (1)       |
| Normal                                | 966 (31)    | 228 (24.4)  |
| Overweight                            | 1168 (37.4) | 370 (39.5)  |
| Obesity                               | 954 (30.5)  | 329 (35)    |
| <b>Race, n (%)</b>                    |             |             |
| Amerindian                            | 24 (0.77)   | 16 (1.7)    |
| White                                 | 157 (5)     | 73 (7.8)    |
| Mexican Mestizo                       | 2928 (93.8) | 836 (89.3)  |
| Other                                 | 11 (0.35)   | 11 (1.1)    |
| <b>Comorbidities, n (%)</b>           |             |             |
| 0                                     | 2665 (85.4) | 781 (83.4)  |
| 1                                     | 361 (11.6)  | 128 (13.7)  |
| 2                                     | 94 (3)      | 27 (2.9)    |
| 3 or more                             | 9 (0.28)    | 7 (0.74)    |
| <b>Asthma</b>                         | 36 (1.15)   | 12 (1.3)    |
| <b>Systolic arterial hypertension</b> | 297 (9.5)   | 104 (11.1)  |
| <b>Type 2 Diabetes Mellitus</b>       | 216 (6.9)   | 66 (7.1)    |

**Note:** AVX = Vaccine AVX/COVID-12, AZ = Vaccine ChAdOx-1-S, SD = Standard Deviation, BMI = Body Mass Index.

**Table 2.** History of prior SARS-CoV-2 vaccination and/or infection of the phase II/III participants at baseline

| n (%) | AVX | AZ |
|-------|-----|----|
|-------|-----|----|



|                                                      | <b>3120</b>  | <b>936</b>  |
|------------------------------------------------------|--------------|-------------|
| <b>Prior infection, n (%)</b>                        | 191 (6.1)    | 53 (5.6)    |
| <b>Time (months) since last infection, mean (SD)</b> | 14.2 (10.8)  | 12.2 (10.9) |
| <b>Number of prior vaccines, n (%)</b>               |              |             |
| 1                                                    | 1103 (35.35) | 313 (33.44) |
| 2                                                    | 1324 (42.44) | 394 (42.09) |
| 3                                                    | 600 (19.23)  | 211 (22.54) |
| 4                                                    | 87 (2.79)    | 18 (1.92)   |
| 5                                                    | 6 (0.19)     | 0           |
| <b>Previous vaccination dose(s) received, n (%)</b>  |              |             |
| <b>AstraZeneca</b>                                   |              |             |
| 1                                                    | 914 (29.29)  | 252 (26.92) |
| 2                                                    | 754 (24.17)  | 236 (25.21) |
| 3 or more                                            | 146 (4.68)   | 53 (5.66)   |
| <b>Pfizer</b>                                        |              |             |
| 1                                                    | 133 (4.26)   | 45 (4.81)   |
| 2                                                    | 458 (14.68)  | 126 (13.46) |
| 3                                                    | 12 (0.38)    | 5 (0.53)    |
| <b>CanSino</b>                                       |              |             |
| 1                                                    | 411 (13.17)  | 172 (18.38) |
| 2                                                    | 52 (1.67)    | 10 (1.07)   |
| 3                                                    | 1 (.03)      | 0           |
| <b>Sputnik</b>                                       |              |             |
| 1                                                    | 196 (6.28)   | 50 (5.34)   |
| 2                                                    | 186 (5.96)   | 44 (4.70)   |
| 3                                                    | 43 (1.38)    | 9 (0.96)    |
| <b>Sinovac</b>                                       |              |             |
| 1                                                    | 81 (2.60)    | 28 (2.99)   |
| 2                                                    | 148 (4.74)   | 34 (3.63)   |
| 3                                                    | 3 (0.10)     | 0           |
| <b>Moderna</b>                                       |              |             |
| 1                                                    | 78 (2.50)    | 34 (3.63)   |
| 2                                                    | 38 (1.22)    | 9 (0.96)    |
| 3                                                    | 2 (0.06)     | 0           |
| <b>Novavax</b>                                       |              |             |
| 1                                                    | 7 (0.22)     | 5 (0.53)    |
| 2                                                    | 10 (0.32)    | 3 (0.32)    |
| 3                                                    | 35 (1.12)    | 22 (2.35)   |
| <b>Coronavac</b>                                     |              |             |
| 1                                                    | 8 (0.26)     | 0           |
| 2                                                    | 20 (0.64)    | 3 (0.32)    |
| <b>Janssen</b>                                       |              |             |
| 1                                                    | 14 (0.45)    | 5 (0.53)    |

| n (%)     | AVX<br>3120 | AZ<br>936 |
|-----------|-------------|-----------|
| 2         | 12 (0.38)   | 5 (0.53)  |
| Sinopharm |             |           |
| 1         | 2 (0.06)    | 0         |
| Curevac   |             |           |
| 1         | 0           | 0         |
| 2         | 0           | 2 (0.21)  |

**Note:** AVX = Vaccine AVX/COVID-12, AZ = Vaccine ChAdOx-1-S, SD = Standard Deviation.

**Table 3.** Demographic characteristics of phase III immunobridging

| n (%)                       | AVX<br>705 (49.7) | AZ<br>712 (50.3) | p-Value |
|-----------------------------|-------------------|------------------|---------|
| <b>Age, mean (SD)</b>       | 40.3 (14.8)       | 40.3 (14.5)      | 0.81    |
| <b>Age groups</b>           |                   |                  |         |
| < 20 years old              | 25 (3.5)          | 28 (3.9)         | 0.61    |
| 20 – 29 years old           | 195 (27.6)        | 191 (26.8)       |         |
| 30 - 39 years old           | 134 (19)          | 135 (18.9)       |         |
| 40 - 49 years old           | 152 (21.5)        | 149 (20.9)       |         |
| 50 – 59 years old           | 111 (15.7)        | 137 (19.2)       |         |
| 60 - 69 years old           | 67 (9.5)          | 59 (8.2)         |         |
| 70 – 79 years old           | 18 (2.5)          | 11 (1.5)         |         |
| 80 and more                 | 3 (0.4)           | 2 (0.2)          |         |
| <b>Gender, n (%)</b>        |                   |                  |         |
| Male                        | 330 (46.8)        | 341 (47.9)       | 0.68    |
| Female                      | 375 (53.2)        | 371 (52.1)       |         |
| <b>BMI, mean (SD)</b>       | 27.9 (5.1)        | 28.8 (5.5)       | 0.002   |
| <b>BMI classification</b>   |                   |                  |         |
| Underweight                 | 5 (0.7)           | 7 (1)            | 0.008   |
| Normal                      | 214 (30.3)        | 162 (22.7)       |         |
| Overweight                  | 271 (38.4)        | 285 (40)         |         |
| Obesity                     | 215 (30.5)        | 258 (36.2)       |         |
| <b>Race, n (%)</b>          |                   |                  |         |
| Amerindian                  | 13 (1.8)          | 14 (1.9)         | 0.71    |
| White                       | 39 (5.5)          | 50 (7)           |         |
| Mexican Mestizo             | 643 (91.2)        | 638 (89.6)       |         |
| Other                       | 10 (1.4)          | 10 (1.4)         |         |
| <b>Comorbidities, n (%)</b> |                   |                  |         |
| 0                           | 433 (61.4)        | 380 (53.3)       | 0.01    |
| 1                           | 216 (30.6)        | 249 (34.9)       |         |
| 2                           | 43 (6.1)          | 65 (9.13)        |         |

|                                       |          |           |      |
|---------------------------------------|----------|-----------|------|
| 3 or more                             | 13 (1.8) | 18 (2.5)  |      |
| <b>Asthma</b>                         | 7 (1.0)  | 8 (1.1)   | 0.81 |
| <b>Systolic arterial hypertension</b> | 59 (8.3) | 83 (11.6) | 0.04 |
| <b>Type 2 Diabetes Mellitus</b>       | 41 (5.8) | 56 (7.8)  | 0.12 |

**Note:** AVX = Vaccine AVX/COVID-12, AZ = Vaccine ChAdOx-1-S, SD = Standard Deviation, BMI = Body Mass Index. Mann–Whitney U tests were conducted for the comparison for continuous variables, and the Chi-Square test for categorical variables. In instances where a p-value is not displayed, it indicates that the sample size was inadequate to conduct the analysis. Statistically significant differences indicated by p-values:  $p \leq 0.05$ .

**Table 4.** History of prior SARS-CoV-2 vaccination and/or infection of participants of the phase III immunobridging study at baseline

| n (%)                                               | AVX<br>705 (49.8) | AZ<br>712 (50.2) | p-Value |
|-----------------------------------------------------|-------------------|------------------|---------|
| <b>Prior infection, n (%)</b>                       | 33 (4.6)          | 38 (5.3)         | 0.57    |
| <b>Time (month) since last infection, mean (SD)</b> | 13.7 (7.3)        | 16 (8.7)         | 0.28    |
| <b>Number of prior vaccines, n (%)</b>              |                   |                  |         |
| 1                                                   | 218 (30.92)       | 233 (32.72)      | 0.73    |
| 2                                                   | 306 (43.40)       | 294 (41.29)      |         |
| 3                                                   | 169 (23.97)       | 169 (23.73)      |         |
| 4                                                   | 12 (1.70)         | 16 (2.24)        |         |
| <b>Previous vaccination dose(s) received, n (%)</b> |                   |                  |         |
| <b>AstraZeneca</b>                                  |                   |                  |         |
| 1                                                   | 182 (25.81)       | 178 (25)         | 0.84    |
| 2                                                   | 171 (24.25)       | 182 (25.56)      |         |
| 3 or more                                           | 45 (6.38)         | 45 (6.32)        |         |
| <b>Pfizer</b>                                       |                   |                  |         |
| 1                                                   | 29 (4.11)         | 31 (4.35)        | 0.85    |
| 2                                                   | 96 (13.61)        | 93 (13.06)       |         |
| 3                                                   | 3 (0.42)          | 2 (0.28)         |         |
| <b>Cansino</b>                                      |                   |                  |         |
| 1                                                   | 118 (16.73)       | 124 (17.41)      | 0.24    |
| 2                                                   | 12 (1.70)         | 7 (0.98)         |         |
| <b>Sputnik</b>                                      |                   |                  |         |
| 1                                                   | 47 (6.66)         | 50 (7.02)        | 0.4     |
| 2                                                   | 42 (5.95)         | 38 (5.33)        |         |
| 3                                                   | 13 (1.84)         | 8 (1.12)         |         |
| <b>Sinovac</b>                                      |                   |                  |         |
| 1                                                   | 15 (2.12)         | 24 (3.37)        | 0.25    |
| 2                                                   | 28 (3.97)         | 28 (3.93)        |         |
| 3                                                   | 1 (0.14)          | 0                |         |
| <b>Moderna</b>                                      |                   |                  |         |

| n (%)     | AVX        | AZ         | p-Value |
|-----------|------------|------------|---------|
|           | 705 (49.8) | 712 (50.2) |         |
| 1         | 32 (4.53)  | 23 (3.23)  | 0.12    |
| 2         | 4 (0.56)   | 9 (1.26)   |         |
| Novavax   |            |            |         |
| 1         | 2 (0.28)   | 4 (0.56)   | 0.62    |
| 2         | 4 (0.56)   | 3 (0.42)   |         |
| 3         | 11 (1.56)  | 18 (2.52)  |         |
| Coronavac |            |            |         |
| 1         | 3 (0.42)   | 0          | 0.99    |
| 2         | 8 (1.13)   | 3 (0.42)   |         |
| Janssen   |            |            |         |
| 1         | 2 (0.28)   | 3 (0.42)   | 0.99    |
| 2         | 3 (0.42)   | 3 (0.42)   |         |
| Curevac   |            |            |         |
| 1         | 0          | 0          |         |
| 2         | 0          | 2 (0.28)   | NA      |

**Note:** AVX = Vaccine AVX/COVID-12, AZ = Vaccine ChAdOx-1-S, SD = Standard Deviation. Mann–Whitney U tests were conducted for the comparison for continuous variables, and the Chi-Square test for categorical variables. In instances where a p-value is not displayed (NA), it indicates that the sample size was inadequate to conduct the analysis. Statistically significant differences indicated by p-values:  $p \leq 0.05$ .

**Table 5.** AVX/COVID-12 vaccine meets WHO's non-inferiority criteria in comparison to AZ/ChAdOx-1-S neutralizing antibody titers at 14 days post-boosting

|                                           | Basal           |                 | GM Ratio    | P-Value |
|-------------------------------------------|-----------------|-----------------|-------------|---------|
|                                           | AVX/COVID-12    | AZ/ChAdOx-1-S   |             |         |
| <b>TOTAL Subjects</b>                     | 705             | 712             |             |         |
| <b>GM of neutralizing antibody titers</b> | 767.5           | 836.5           | 0.92        | 0.23    |
| <b>CI</b>                                 | 690.8 - 852.7   | 760.7 - 919.9   | 0.78 - 1.03 |         |
| <b>Seroconverted participants</b>         |                 |                 |             |         |
| <b>GM</b>                                 | 410             | 397             | 0.84        | 0.05    |
| <b>CI</b>                                 | 409.5           | 487.9           | 0.70 - 1.00 |         |
| <b>CI</b>                                 | 359.9 - 465.9   | 433.3 - 549.3   |             |         |
| <b>Non-seroconverted participants</b>     |                 |                 |             |         |
| <b>GM</b>                                 | 295             | 315             | 1.11        | 0.20    |
| <b>CI</b>                                 | 1837.6          | 1650.3          | 0.94 - 1.31 |         |
| <b>CI</b>                                 | 1631.5 - 2069.7 | 1467.3 - 1856.1 |             |         |
| <b>14 días</b>                            |                 |                 |             |         |
|                                           | AVX             | AZ              | GM Ratio    |         |
| <b>TOTAL Subjects</b>                     | 705             | 712             |             |         |
| <b>GM</b>                                 | 1305.2          | 1364.38         | 0.96        |         |
| <b>CI</b>                                 | 1210.8 - 1407.5 | 1260.7- 1476.5  | 0.85 - 1.06 |         |
| <b>Seroconverted participants</b>         | 410             | 397             |             |         |

|                                       |                |                 |             |
|---------------------------------------|----------------|-----------------|-------------|
| <b>GM</b>                             | 1484.5         | 1763.1          | 0.84        |
| <b>CI</b>                             | 1342.8 -1641.1 | 1587.9 - 1957.6 | 0.72 - 0.97 |
| <b>Non-seroconverted participants</b> |                |                 |             |
|                                       | 295            | 315             |             |
| <b>GM</b>                             | 1091.5         | 987.6           | 1.11        |
| <b>CI</b>                             | 977.2 - 1219.2 | 883.8 -1103.6   | 0.94 - 1.29 |

**Note:** GM = Geometric Mean, CI = Confidence Interval, The GM ratio was calculated as GM AVX/COVID-12 / GM AZ/ChAdOx-1-S. The CIs were calculated using a t-Student test with the transforming variable on a natural logarithmic scale.

**Table 6.** Incidence of COVID-19 cases

| <b>Subjects in the study</b>    | <b>Total<br/>1,417</b> | <b>AVX/COVID-12<br/>705 (49.8)</b> | <b>AZ/ChAdOx-1-S<br/>712 (50.2)</b> |
|---------------------------------|------------------------|------------------------------------|-------------------------------------|
| Total follow-up time in days    | 255,143                | 127,120                            | 128,023                             |
| Average time (SD) in days       | 180 (31.6)             | 180.3 (29.6)                       | 179.8 (33.5)                        |
| COVID-19 cases (%) <sup>1</sup> | 79 (5.5)               | 37 (5.3)                           | 42 (6.3)                            |
| Incidence rate per 1000 days    | 0.30                   | 0.29                               | 0.32                                |

<sup>1</sup>Log Rank Test: p-value = 0.58



**Supplementary Table 1.** Proportion of affected subjects by local adverse events of special interest at 7 days post-immunization

| SOC                                    | PT                           | Severity                     | AVX  | %       | AZ     | %       | Total | %       | p-Value |      |
|----------------------------------------|------------------------------|------------------------------|------|---------|--------|---------|-------|---------|---------|------|
| Subjects                               |                              |                              | 3120 |         | 936    |         | 4056  |         |         |      |
| Any AE                                 |                              | <b>Total</b>                 | 800  | (25.64) | 193    | (20.61) | 993   | (24.48) | 0.001   |      |
|                                        |                              | <b>Mi</b>                    | 698  | (22.37) | 173    | (18.48) | 871   | (21.47) | 0.01    |      |
|                                        |                              | <b>Mo</b>                    | 108  | (3.46)  | 21     | (2.24)  | 129   | (3.18)  | 0.06    |      |
|                                        |                              | <b>S</b>                     | 9    | (0.28)  | 0      | (0)     | 9     | (0.22)  | 0.10    |      |
| Skin and subcutaneous tissue disorders |                              | <b>Total</b>                 | 23   | (0.73)  | 5      | (0.53)  | 28    | (0.69)  | 0.51    |      |
|                                        |                              | <b>Mi</b>                    | 17   | (0.54)  | 5      | (0.53)  | 22    | (0.54)  | 0.96    |      |
|                                        |                              | <b>Mo</b>                    | 6    | (0.19)  | 0      | (0)     | 6     | (0.14)  | 0.17    |      |
|                                        |                              | <b>S</b>                     | 0    | (0)     | 0      | (0)     | 0     | (0)     |         |      |
|                                        | Erythema                     | Mo                           | 1    | (0.03)  | 0      | (0)     | 1     | (0.02)  | 0.58    |      |
|                                        | Papule                       | Mi                           | 2    | (0.06)  | 1      | (0.1)   | 3     | (0.07)  | 0.67    |      |
|                                        | Itching                      | Mi                           | 15   | (0.48)  | 4      | (0.42)  | 19    | (0.46)  | 0.83    |      |
|                                        | Itching                      | Mo                           | 5    | (0.16)  | 0      | (0)     | 5     | (0.12)  | 0.22    |      |
| Nervous system disorders               |                              | <b>Total</b>                 | 6    | (0.19)  | 0      | (0)     | 6     | (0.14)  | 0.17    |      |
|                                        |                              | <b>Mi</b>                    | 5    | (0.16)  | 0      | (0)     | 5     | (0.12)  | 0.22    |      |
|                                        |                              | <b>Mo</b>                    | 1    | (0.03)  | 0      | (0)     | 1     | (0.02)  | 0.58    |      |
|                                        |                              | <b>S</b>                     | 0    | (0)     | 0      | (0)     | 0     | (0)     |         |      |
|                                        | Paresthesia                  | Mi                           | 5    | (0.16)  | 0      | (0)     | 5     | (0.12)  | 0.22    |      |
|                                        | Paresthesia                  | Mo                           | 1    | (0.03)  | 0      | (0)     | 1     | (0.02)  | 0.58    |      |
| General disorders and local events     |                              | <b>Total</b>                 | 786  | (25.19) | 190    | (20.29) | 976   | (24.06) | 0.002   |      |
|                                        |                              | <b>Mi</b>                    | 685  | (21.95) | 170    | (18.16) | 855   | (21.07) | 0.01    |      |
|                                        |                              | <b>Mo</b>                    | 101  | (3.23)  | 21     | (2.24)  | 122   | (3)     | 0.11    |      |
|                                        |                              | <b>S</b>                     | 9    | (0.28)  | 0      | (0)     | 9     | (0.22)  | 0.10    |      |
|                                        |                              | Heat at the vaccination site | Mi   | 1       | (0.03) | 0       | (0)   | 1       | (0.02)  | 0.58 |
|                                        |                              | Pain at the application site | Mi   | 3       | (0.09) | 0       | (0)   | 3       | (0.07)  | 0.34 |
|                                        | Pain at the application site | Mi                           | 655  | (20.99) | 165    | (17.62) | 820   | (20.21) | 0.02    |      |

| SOC | PT                                                     | Severity     | AVX       | %             | AZ       | %          | Total     | %             | p-Value     |
|-----|--------------------------------------------------------|--------------|-----------|---------------|----------|------------|-----------|---------------|-------------|
|     | Pain at the injection site                             | Mo           | 98        | (3.14)        | 21       | (2.24)     | 119       | (2.93)        | 0.15        |
|     | Pain at the injection site                             | S            | 8         | (0.25)        | 0        | (0)        | 8         | (0.19)        | 0.12        |
|     | Edema at the injection site                            | Mi           | 4         | (0.12)        | 1        | (0.1)      | 5         | (0.12)        | 0.87        |
|     | Edema at the injection site                            | Mo           | 5         | (0.16)        | 0        | (0)        | 5         | (0.12)        | 0.22        |
|     | Redness at the injection site                          | Mi           | 28        | (0.89)        | 9        | (0.96)     | 37        | (0.91)        | 0.85        |
|     | Redness at the injection site                          | Mo           | 7         | (0.22)        | 0        | (0)        | 7         | (0.17)        | 0.14        |
|     | Redness at the injection site                          | S            | 1         | (0.03)        | 0        | (0)        | 1         | (0.02)        | 0.58        |
|     | Hematoma at the injection site                         | Mi           | 1         | (0.03)        | 1        | (0.1)      | 2         | (0.04)        | 0.36        |
|     | Swelling                                               | Mi           | 4         | (0.12)        | 2        | (0.21)     | 6         | (0.14)        | 0.55        |
|     | Induration at the application site                     | Mi           | 11        | (0.35)        | 3        | (0.32)     | 14        | (0.34)        | 0.88        |
|     | Inflammation                                           | Mi           | 13        | (0.41)        | 1        | (0.1)      | 14        | (0.34)        | 0.15        |
|     | Nerve injury at the injection site                     | Mi           | 0         | (0)           | 2        | (0.21)     | 2         | (0.04)        | 0.009       |
|     | Itching at the injection site                          | Mi           | 0         | (0)           | 1        | (0.1)      | 1         | (0.02)        | 0.07        |
|     | <b>Musculoskeletal and connective tissue disorders</b> | <b>Total</b> | <b>10</b> | <b>(0.32)</b> | <b>0</b> | <b>(0)</b> | <b>10</b> | <b>(0.24)</b> | <b>0.08</b> |
|     |                                                        | <b>Mi</b>    | <b>6</b>  | <b>(0.19)</b> | <b>0</b> | <b>(0)</b> | <b>6</b>  | <b>(0.14)</b> | <b>0.17</b> |
|     |                                                        | <b>Mo</b>    | <b>4</b>  | <b>(0.12)</b> | <b>0</b> | <b>(0)</b> | <b>4</b>  | <b>(0.09)</b> | <b>0.27</b> |
|     |                                                        | <b>S</b>     | <b>0</b>  | <b>(0)</b>    | <b>0</b> | <b>(0)</b> | <b>0</b>  | <b>(0)</b>    |             |
|     | Pain in a limb                                         | Mi           | 4         | (0.12)        | 0        | (0)        | 4         | (0.09)        | 0.27        |
|     | Pain in a limb                                         | Mo           | 3         | (0.09)        | 0        | (0)        | 3         | (0.07)        | 0.34        |
|     | Discomfort in the extremities                          | Mi           | 2         | (0.06)        | 0        | (0)        | 2         | (0.04)        | 0.43        |
|     | Discomfort in the extremities                          | Mo           | 1         | (0.03)        | 0        | (0)        | 1         | (0.02)        | 0.58        |

SOC: System Organ Class; PT: Preferred term; AE: Adverse Event; Mi: Mild; Mo: Moderate; S: Severe; AVX: AVX/COVID-12; AZ: AZ/ChAdOx-1-S. P-value calculated from comparison of proportions (Z-test)

**Supplementary Table 2.** Proportion of affected subjects by systemic adverse events of special interest at 7 days post-immunization

| SOC | PT | Severity | AVX | % | AZ | % | Total | % | p-Value |
|-----|----|----------|-----|---|----|---|-------|---|---------|
|-----|----|----------|-----|---|----|---|-------|---|---------|

| SOC                                    | PT                            | Severity     | AVX  | %       | AZ  | %       | Total | %       | p-Value |
|----------------------------------------|-------------------------------|--------------|------|---------|-----|---------|-------|---------|---------|
| Subjects                               |                               |              | 3120 |         | 936 |         | 4056  |         |         |
| Any AE                                 |                               | <b>Total</b> | 596  | (19.1)  | 203 | (21.68) | 799   | (19.69) | 0.08    |
|                                        |                               | <b>Mi</b>    | 496  | (15.89) | 183 | (19.55) | 679   | (16.74) | 0.008   |
|                                        |                               | <b>Mo</b>    | 139  | (4.45)  | 39  | (4.16)  | 178   | (4.38)  | 0.70    |
|                                        |                               | <b>S</b>     | 16   | (0.51)  | 2   | (0.21)  | 18    | (0.44)  | 0.22    |
| Supplementary examinations             |                               | <b>Total</b> | 1    | (0.03)  | 1   | (0.1)   | 2     | (0.04)  | 0.36    |
|                                        |                               | <b>Mi</b>    | 1    | (0.03)  | 1   | (0.1)   | 2     | (0.04)  | 0.36    |
|                                        |                               | <b>Mo</b>    | 1    | (0.03)  | 0   | (0)     | 1     | (0.02)  | 0.58    |
|                                        |                               | <b>S</b>     | 0    | (0)     | 0   | (0)     | 0     | (0)     |         |
|                                        | High blood pressure elevation | <b>Mi</b>    | 1    | (0.03)  | 1   | (0.1)   | 2     | (0.04)  | 0.36    |
| Infections and infestations            |                               | <b>Total</b> | 2    | (0.06)  | 0   | (0)     | 2     | (0.04)  | 0.43    |
|                                        |                               | <b>Mi</b>    | 1    | (0.03)  | 0   | (0)     | 1     | (0.02)  | 0.58    |
|                                        |                               | <b>Mo</b>    | 1    | (0.03)  | 0   | (0)     | 1     | (0.02)  | 0.58    |
|                                        |                               | <b>S</b>     | 0    | (0)     | 0   | (0)     | 0     | (0)     |         |
|                                        | Oral herpes                   | <b>Mi</b>    | 1    | (0.03)  | 0   | (0)     | 1     | (0.02)  | 0.58    |
|                                        | Oral herpes                   | <b>Mo</b>    | 1    | (0.03)  | 0   | (0)     | 1     | (0.02)  | 0.58    |
| Cardiac disorders                      |                               | <b>Total</b> | 3    | (0.09)  | 3   | (0.32)  | 6     | (0.14)  | 0.11    |
|                                        |                               | <b>Mi</b>    | 2    | (0.06)  | 3   | (0.32)  | 5     | (0.12)  | 0.05    |
|                                        |                               | <b>Mo</b>    | 1    | (0.03)  | 0   | (0)     | 1     | (0.02)  | 0.58    |
|                                        |                               | <b>S</b>     | 0    | (0)     | 0   | (0)     | 0     | (0)     |         |
|                                        | Chest pain                    | <b>Mi</b>    | 0    | (0)     | 1   | (0.1)   | 1     | (0.02)  | 0.07    |
|                                        | Palpitations                  | <b>Mi</b>    | 1    | (0.03)  | 1   | (0.1)   | 2     | (0.04)  | 0.36    |
|                                        | Tachycardia                   | <b>Mi</b>    | 1    | (0.03)  | 1   | (0.1)   | 2     | (0.04)  | 0.36    |
|                                        | Tachycardia                   | <b>Mo</b>    | 1    | (0.03)  | 0   | (0)     | 1     | (0.02)  | 0.58    |
| Skin and subcutaneous tissue disorders |                               | <b>Total</b> | 6    | (0.19)  | 2   | (0.21)  | 8     | (0.19)  | 0.89    |
|                                        |                               | <b>Mi</b>    | 4    | (0.12)  | 1   | (0.1)   | 5     | (0.12)  | 0.87    |
|                                        |                               | <b>Mo</b>    | 1    | (0.03)  | 1   | (0.1)   | 2     | (0.04)  | 0.36    |
|                                        |                               | <b>S</b>     | 1    | (0.03)  | 0   | (0)     | 1     | (0.02)  | 0.58    |

| SOC | PT                                        | Severity     | AVX      | %             | AZ       | %            | Total    | %             | p-Value     |
|-----|-------------------------------------------|--------------|----------|---------------|----------|--------------|----------|---------------|-------------|
|     | Rash                                      | Mi           | 2        | (0.06)        | 0        | (0)          | 2        | (0.04)        | 0.43        |
|     | Excessive sweating                        | Mi           | 0        | (0)           | 1        | (0.1)        | 1        | (0.02)        | 0.07        |
|     | Excessive sweating                        | S            | 1        | (0.03)        | 0        | (0)          | 1        | (0.02)        | 0.58        |
|     | Skin lesion                               | Mo           | 0        | (0)           | 1        | (0.1)        | 1        | (0.02)        | 0.07        |
|     | Hives                                     | Mi           | 2        | (0.06)        | 0        | (0)          | 2        | (0.04)        | 0.43        |
|     | Hives                                     | Mo           | 1        | (0.03)        | 0        | (0)          | 1        | (0.02)        | 0.58        |
|     | <b>Reproductive and breast disorders</b>  | <b>Total</b> | <b>3</b> | <b>(0.09)</b> | <b>1</b> | <b>(0.1)</b> | <b>4</b> | <b>(0.09)</b> | <b>0.92</b> |
|     |                                           | <b>Mi</b>    | <b>2</b> | <b>(0.06)</b> | <b>1</b> | <b>(0.1)</b> | <b>3</b> | <b>(0.07)</b> | <b>0.67</b> |
|     |                                           | <b>Mo</b>    | <b>1</b> | <b>(0.03)</b> | <b>0</b> | <b>(0)</b>   | <b>1</b> | <b>(0.02)</b> | <b>0.58</b> |
|     |                                           | <b>S</b>     | <b>0</b> | <b>(0)</b>    | <b>0</b> | <b>(0)</b>   | <b>0</b> | <b>(0)</b>    |             |
|     | Polymenorrhea                             | Mi           | 0        | (0)           | 1        | (0.1)        | 1        | (0.02)        | 0.07        |
|     | Polymenorrhea                             | Mo           | 1        | (0.03)        | 0        | (0)          | 1        | (0.02)        | 0.58        |
|     | Heavy menstrual bleeding                  | Mi           | 1        | (0.03)        | 0        | (0)          | 1        | (0.02)        | 0.58        |
|     | Menstrual disorders                       | Mi           | 1        | (0.03)        | 0        | (0)          | 1        | (0.02)        | 0.58        |
|     | <b>Metabolism and nutrition disorders</b> | <b>Total</b> | <b>0</b> | <b>(0)</b>    | <b>1</b> | <b>(0.1)</b> | <b>1</b> | <b>(0.02)</b> | <b>0.07</b> |
|     |                                           | <b>Mi</b>    | <b>0</b> | <b>(0)</b>    | <b>1</b> | <b>(0.1)</b> | <b>1</b> | <b>(0.02)</b> | <b>0.07</b> |
|     |                                           | <b>Mo</b>    | <b>0</b> | <b>(0)</b>    | <b>0</b> | <b>(0)</b>   | <b>0</b> | <b>(0)</b>    |             |
|     |                                           | <b>S</b>     | <b>0</b> | <b>(0)</b>    | <b>0</b> | <b>(0)</b>   | <b>0</b> | <b>(0)</b>    |             |
|     | Decreased appetite                        | Mi           | 0        | (0)           | 1        | (0.1)        | 1        | (0.02)        | 0.07        |
|     | <b>Ear and labyrinth disorders</b>        | <b>Total</b> | <b>2</b> | <b>(0.06)</b> | <b>1</b> | <b>(0.1)</b> | <b>3</b> | <b>(0.07)</b> | <b>0.67</b> |
|     |                                           | <b>Mi</b>    | <b>2</b> | <b>(0.06)</b> | <b>0</b> | <b>(0)</b>   | <b>2</b> | <b>(0.04)</b> | <b>0.43</b> |
|     |                                           | <b>Mo</b>    | <b>0</b> | <b>(0)</b>    | <b>1</b> | <b>(0.1)</b> | <b>1</b> | <b>(0.02)</b> | <b>0.07</b> |
|     |                                           | <b>S</b>     | <b>0</b> | <b>(0)</b>    | <b>0</b> | <b>(0)</b>   | <b>0</b> | <b>(0)</b>    |             |
|     | Vertigo                                   | Mi           | 2        | (0.06)        | 0        | (0)          | 2        | (0.04)        | 0.43        |
|     | Vertigo                                   | Mo           | 0        | (0)           | 1        | (0.1)        | 1        | (0.02)        | 0.07        |
|     | <b>Immune system disorders</b>            | <b>Total</b> | <b>2</b> | <b>(0.06)</b> | <b>0</b> | <b>(0)</b>   | <b>2</b> | <b>(0.04)</b> | <b>0.43</b> |
|     |                                           | <b>Mi</b>    | <b>2</b> | <b>(0.06)</b> | <b>0</b> | <b>(0)</b>   | <b>2</b> | <b>(0.04)</b> | <b>0.43</b> |
|     |                                           | <b>Mo</b>    | <b>0</b> | <b>(0)</b>    | <b>0</b> | <b>(0)</b>   | <b>0</b> | <b>(0)</b>    |             |

| SOC | PT                                | Severity     | AVX        | %             | AZ        | %              | Total      | %             | p-Value     |
|-----|-----------------------------------|--------------|------------|---------------|-----------|----------------|------------|---------------|-------------|
|     |                                   | <b>S</b>     | 0          | (0)           | 0         | (0)            | 0          | (0)           |             |
|     | Hypersensitivity                  | Mi           | 2          | (0.06)        | 0         | (0)            | 2          | (0.04)        | 0.43        |
|     | <b>Nervous system disorders</b>   | <b>Total</b> | <b>270</b> | <b>(8.65)</b> | <b>98</b> | <b>(10.47)</b> | <b>368</b> | <b>(9.07)</b> | <b>0.08</b> |
|     |                                   | <b>Mi</b>    | 193        | (6.18)        | 77        | (8.22)         | 270        | (6.65)        | 0.02        |
|     |                                   | <b>Mo</b>    | 69         | (2.21)        | 21        | (2.24)         | 90         | (2.21)        | 0.95        |
|     |                                   | <b>S</b>     | 10         | (0.32)        | 1         | (0.1)          | 11         | (0.27)        | 0.27        |
|     | Headache                          | Mi           | 171        | (5.48)        | 72        | (7.69)         | 243        | (5.99)        | 0.01        |
|     | Headache                          | Mo           | 66         | (2.11)        | 21        | (2.24)         | 87         | (2.14)        | 0.81        |
|     | Headache                          | S            | 8          | (0.25)        | 0         | (0)            | 8          | (0.19)        | 0.12        |
|     | Dizziness                         | Mi           | 15         | (0.48)        | 7         | (0.74)         | 22         | (0.54)        | 0.32        |
|     | Dizziness                         | Mo           | 2          | (0.06)        | 0         | (0)            | 2          | (0.04)        | 0.43        |
|     | Migraine                          | Mi           | 1          | (0.03)        | 0         | (0)            | 1          | (0.02)        | 0.58        |
|     | Paresthesia                       | Mi           | 2          | (0.06)        | 0         | (0)            | 2          | (0.04)        | 0.43        |
|     | Drowsiness                        | Mi           | 11         | (0.35)        | 1         | (0.1)          | 12         | (0.29)        | 0.22        |
|     | Drowsiness                        | Mo           | 3          | (0.09)        | 0         | (0)            | 3          | (0.07)        | 0.34        |
|     | Drowsiness                        | S            | 4          | (0.12)        | 1         | (0.1)          | 5          | (0.12)        | 0.87        |
|     | Tremor                            | Mi           | 1          | (0.03)        | 0         | (0)            | 1          | (0.02)        | 0.58        |
|     | <b>Gastrointestinal disorders</b> | <b>Total</b> | <b>62</b>  | <b>(1.98)</b> | <b>21</b> | <b>(2.24)</b>  | <b>83</b>  | <b>(2.04)</b> | <b>0.62</b> |
|     |                                   | <b>Mi</b>    | 47         | (1.5)         | 19        | (2.02)         | 66         | (1.62)        | 0.26        |
|     |                                   | <b>Mo</b>    | 15         | (0.48)        | 2         | (0.21)         | 17         | (0.41)        | 0.26        |
|     |                                   | <b>S</b>     | 1          | (0.03)        | 1         | (0.1)          | 2          | (0.04)        | 0.36        |
|     | Diarrhea                          | Mi           | 25         | (0.8)         | 10        | (1.06)         | 35         | (0.86)        | 0.43        |
|     | Diarrhea                          | Mo           | 8          | (0.25)        | 1         | (0.1)          | 9          | (0.22)        | 0.39        |
|     | Diarrhea                          | S            | 1          | (0.03)        | 0         | (0)            | 1          | (0.02)        | 0.58        |
|     | Abdominal distension              | Mi           | 1          | (0.03)        | 0         | (0)            | 1          | (0.02)        | 0.58        |
|     | Abdominal pain                    | Mi           | 5          | (0.16)        | 1         | (0.1)          | 6          | (0.14)        | 0.70        |
|     | Abdominal pain                    | Mo           | 2          | (0.06)        | 0         | (0)            | 2          | (0.04)        | 0.43        |
|     | Abdominal pain                    | S            | 0          | (0)           | 1         | (0.1)          | 1          | (0.02)        | 0.07        |



| SOC                                                          | PT                     | Severity  | AVX        | %             | AZ         | %              | Total      | %             | p-Value       |
|--------------------------------------------------------------|------------------------|-----------|------------|---------------|------------|----------------|------------|---------------|---------------|
|                                                              | Upper abdominal pain   | Mi        | 1          | (0.03)        | 0          | (0)            | 1          | (0.02)        | 0.58          |
|                                                              | Constipation           | Mi        | 1          | (0.03)        | 0          | (0)            | 1          | (0.02)        | 0.58          |
|                                                              | Nausea                 | Mi        | 4          | (0.12)        | 6          | (0.64)         | 10         | (0.24)        | 0.005         |
|                                                              | Nausea                 | Mo        | 1          | (0.03)        | 1          | (0.1)          | 2          | (0.04)        | 0.36          |
|                                                              | Odynophagia            | Mi        | 12         | (0.38)        | 4          | (0.42)         | 16         | (0.39)        | 0.85          |
|                                                              | Odynophagia            | Mo        | 4          | (0.12)        | 0          | (0)            | 4          | (0.09)        | 0.27          |
|                                                              | Vomiting               | Mi        | 2          | (0.06)        | 1          | (0.1)          | 3          | (0.07)        | 0.67          |
|                                                              | Vomiting               | Mo        | 0          | (0)           | 1          | (0.1)          | 1          | (0.02)        | 0.07          |
|                                                              | Aphthous ulcer         | Mi        | 1          | (0.03)        | 0          | (0)            | 1          | (0.02)        | 0.58          |
| <b>General disorders and administration site alterations</b> | <b>Total</b>           |           | <b>255</b> | <b>(8.17)</b> | <b>110</b> | <b>(11.75)</b> | <b>365</b> | <b>(8.99)</b> | <b>0.0008</b> |
|                                                              |                        | <b>Mi</b> | 204        | (6.53)        | 99         | (10.57)        | 303        | (7.47)        | 0.000         |
|                                                              |                        | <b>Mo</b> | 50         | (1.6)         | 14         | (1.49)         | 64         | (1.57)        | 0.81          |
|                                                              |                        | <b>S</b>  | 7          | (0.22)        | 0          | (0)            | 7          | (0.17)        | 0.14          |
|                                                              | Asthenia               | Mi        | 21         | (0.67)        | 3          | (0.32)         | 24         | (0.59)        | 0.21          |
|                                                              | Asthenia               | Mo        | 2          | (0.06)        | 0          | (0)            | 2          | (0.04)        | 0.43          |
|                                                              | Chest pain             | Mi        | 1          | (0.03)        | 0          | (0)            | 1          | (0.02)        | 0.58          |
|                                                              | Flu-like illness       | Mi        | 2          | (0.06)        | 0          | (0)            | 2          | (0.04)        | 0.43          |
|                                                              | Flu-like illness       | Mo        | 1          | (0.03)        | 1          | (0.1)          | 2          | (0.04)        | 0.36          |
|                                                              | Influenza-like illness | Mi        | 0          | (0)           | 1          | (0.1)          | 1          | (0.02)        | 0.07          |
|                                                              | Shivering              | Mi        | 8          | (0.25)        | 16         | (1.7)          | 24         | (0.59)        | 0.000         |
|                                                              | Shivering              | Mo        | 3          | (0.09)        | 1          | (0.1)          | 4          | (0.09)        | 0.92          |
|                                                              | Shivering              | S         | 1          | (0.03)        | 0          | (0)            | 1          | (0.02)        | 0.58          |
|                                                              | Fatigue                | Mi        | 109        | (3.49)        | 29         | (3.09)         | 138        | (3.4)         | 0.55          |
|                                                              | Fatigue                | Mo        | 30         | (0.96)        | 9          | (0.96)         | 39         | (0.96)        | 0.99          |
|                                                              | Fatigue                | S         | 6          | (0.19)        | 0          | (0)            | 6          | (0.14)        | 0.17          |
|                                                              | Peripheral coldness    | Mi        | 2          | (0.06)        | 0          | (0)            | 2          | (0.04)        | 0.43          |
|                                                              | Hyperthermia           | Mi        | 5          | (0.16)        | 3          | (0.32)         | 8          | (0.19)        | 0.33          |
|                                                              | Inflammation           | Mi        | 1          | (0.03)        | 0          | (0)            | 1          | (0.02)        | 0.58          |

| SOC                                                    | PT                  | Severity     | AVX        | %             | AZ        | %             | Total      | %             | p-Value     |
|--------------------------------------------------------|---------------------|--------------|------------|---------------|-----------|---------------|------------|---------------|-------------|
|                                                        | Discomfort          | Mi           | 1          | (0.03)        | 0         | (0)           | 1          | (0.02)        | 0.58        |
|                                                        | Discomfort          | Mo           | 1          | (0.03)        | 0         | (0)           | 1          | (0.02)        | 0.58        |
|                                                        | General discomfort  | Mi           | 19         | (0.6)         | 9         | (0.96)        | 28         | (0.69)        | 0.25        |
|                                                        | General discomfort  | Mo           | 4          | (0.12)        | 1         | (0.1)         | 5          | (0.12)        | 0.87        |
|                                                        | Chest tightness     | Mi           | 1          | (0.03)        | 1         | (0.1)         | 2          | (0.04)        | 0.36        |
|                                                        | Pyrexia             | Mi           | 50         | (1.6)         | 51        | (5.44)        | 101        | (2.49)        | 0.000       |
|                                                        | Pyrexia             | Mo           | 14         | (0.44)        | 4         | (0.42)        | 18         | (0.44)        | 0.93        |
|                                                        | Pyrexia             | S            | 1          | (0.03)        | 0         | (0)           | 1          | (0.02)        | 0.58        |
|                                                        | Decreased thirst    | Mi           | 0          | (0)           | 1         | (0.1)         | 1          | (0.02)        | 0.06        |
|                                                        | Feeling cold        | Mi           | 0          | (0)           | 1         | (0.1)         | 1          | (0.02)        | 0.07        |
| <b>Musculoskeletal and connective tissue disorders</b> |                     | <b>Total</b> | <b>139</b> | <b>(4.45)</b> | <b>51</b> | <b>(5.44)</b> | <b>190</b> | <b>(4.68)</b> | <b>0.20</b> |
|                                                        |                     | <b>Mi</b>    | <b>98</b>  | <b>(3.14)</b> | <b>43</b> | <b>(4.59)</b> | <b>141</b> | <b>(3.47)</b> | <b>0.03</b> |
|                                                        |                     | <b>Mo</b>    | <b>41</b>  | <b>(1.31)</b> | <b>8</b>  | <b>(0.85)</b> | <b>49</b>  | <b>(1.2)</b>  | <b>0.25</b> |
|                                                        |                     | <b>S</b>     | <b>3</b>   | <b>(0.09)</b> | <b>0</b>  | <b>(0)</b>    | <b>3</b>   | <b>(0.07)</b> | <b>0.34</b> |
|                                                        | Arthralgia          | Mi           | 29         | (0.92)        | 21        | (2.24)        | 50         | (1.23)        | 0.001       |
|                                                        | Arthralgia          | Mo           | 10         | (0.32)        | 4         | (0.42)        | 14         | (0.34)        | 0.62        |
|                                                        | Arthralgia          | S            | 1          | (0.03)        | 0         | (0)           | 1          | (0.02)        | 0.58        |
|                                                        | Back pain           | Mi           | 5          | (0.16)        | 2         | (0.21)        | 7          | (0.17)        | 0.72        |
|                                                        | Back pain           | Mo           | 3          | (0.09)        | 0         | (0)           | 3          | (0.07)        | 0.34        |
|                                                        | Ligament sprain     | Mo           | 0          | (0)           | 1         | (0.1)         | 1          | (0.02)        | 0.07        |
|                                                        | Muscle spasms       | Mi           | 0          | (0)           | 1         | (0.1)         | 1          | (0.02)        | 0.07        |
|                                                        | Myalgia             | Mi           | 68         | (2.17)        | 24        | (2.56)        | 92         | (2.26)        | 0.48        |
|                                                        | Myalgia             | Mo           | 31         | (0.99)        | 4         | (0.42)        | 35         | (0.86)        | 0.10        |
|                                                        | Myalgia             | S            | 2          | (0.06)        | 0         | (0)           | 2          | (0.04)        | 0.43        |
|                                                        | Discomfort in limbs | Mi           | 1          | (0.03)        | 0         | (0)           | 1          | (0.02)        | 0.58        |
| <b>Ocular disorders</b>                                |                     | <b>Total</b> | <b>1</b>   | <b>(0.03)</b> | <b>1</b>  | <b>(0.1)</b>  | <b>2</b>   | <b>(0.04)</b> | <b>0.36</b> |
|                                                        |                     | <b>Mi</b>    | <b>0</b>   | <b>(0)</b>    | <b>1</b>  | <b>(0.1)</b>  | <b>1</b>   | <b>(0.02)</b> | <b>0.07</b> |
|                                                        |                     | <b>Mo</b>    | <b>1</b>   | <b>(0.03)</b> | <b>0</b>  | <b>(0)</b>    | <b>1</b>   | <b>(0.02)</b> | <b>0.58</b> |

| SOC | PT                                                     | Severity     | AVX        | %             | AZ        | %             | Total      | %             | p-Value     |
|-----|--------------------------------------------------------|--------------|------------|---------------|-----------|---------------|------------|---------------|-------------|
|     |                                                        | <b>S</b>     | 0          | (0)           | 0         | (0)           | 0          | (0)           |             |
|     | Allergic conjunctivitis                                | Mo           | 1          | (0.03)        | 0         | (0)           | 1          | (0.02)        | 0.58        |
|     | Photopsia                                              | Mi           | 0          | (0)           | 1         | (0.1)         | 1          | (0.02)        | 0.07        |
|     | <b>Psychiatric disorders</b>                           | <b>Total</b> | <b>5</b>   | <b>(0.16)</b> | <b>3</b>  | <b>(0.32)</b> | <b>8</b>   | <b>(0.19)</b> | <b>0.33</b> |
|     |                                                        | <b>Mi</b>    | <b>5</b>   | <b>(0.16)</b> | <b>3</b>  | <b>(0.32)</b> | <b>8</b>   | <b>(0.19)</b> | <b>0.33</b> |
|     |                                                        | <b>Mo</b>    | <b>0</b>   | <b>(0)</b>    | <b>0</b>  | <b>(0)</b>    | <b>0</b>   | <b>(0)</b>    |             |
|     |                                                        | <b>S</b>     | <b>0</b>   | <b>(0)</b>    | <b>0</b>  | <b>(0)</b>    | <b>0</b>   | <b>(0)</b>    |             |
|     | Mood changes                                           | Mi           | 1          | (0.03)        | 0         | (0)           | 1          | (0.02)        | 0.58        |
|     | Confusional state                                      | Mi           | 1          | (0.03)        | 0         | (0)           | 1          | (0.02)        | 0.58        |
|     | Insomnia                                               | Mi           | 1          | (0.03)        | 2         | (0.21)        | 3          | (0.07)        | 0.07        |
|     | Irritability                                           | Mi           | 2          | (0.06)        | 1         | (0.1)         | 3          | (0.07)        | 0.67        |
|     | <b>Respiratory, thoracic and mediastinal disorders</b> | <b>Total</b> | <b>111</b> | <b>(3.55)</b> | <b>24</b> | <b>(2.56)</b> | <b>135</b> | <b>(3.32)</b> | <b>0.13</b> |
|     |                                                        | <b>Mi</b>    | <b>88</b>  | <b>(2.82)</b> | <b>23</b> | <b>(2.45)</b> | <b>111</b> | <b>(2.73)</b> | <b>0.55</b> |
|     |                                                        | <b>Mo</b>    | <b>24</b>  | <b>(0.76)</b> | <b>3</b>  | <b>(0.32)</b> | <b>27</b>  | <b>(0.66)</b> | <b>0.13</b> |
|     |                                                        | <b>S</b>     | <b>3</b>   | <b>(0.09)</b> | <b>0</b>  | <b>(0)</b>    | <b>3</b>   | <b>(0.07)</b> | <b>0.34</b> |
|     | Asthma                                                 | Mi           | 0          | (0)           | 1         | (0.1)         | 1          | (0.02)        | 0.07        |
|     | Nasal congestion                                       | Mi           | 12         | (0.38)        | 3         | (0.32)        | 15         | (0.36)        | 0.77        |
|     | Nasal congestion                                       | Mo           | 2          | (0.06)        | 0         | (0)           | 2          | (0.04)        | 0.43        |
|     | Dyspnea                                                | Mi           | 2          | (0.06)        | 0         | (0)           | 2          | (0.04)        | 0.43        |
|     | Dyspnea                                                | Mo           | 0          | (0)           | 1         | (0.1)         | 1          | (0.02)        | 0.07        |
|     | Dyspnea                                                | S            | 1          | (0.03)        | 0         | (0)           | 1          | (0.02)        | 0.58        |
|     | Pharyngolaryngeal pain                                 | Mi           | 9          | (0.28)        | 2         | (0.21)        | 11         | (0.27)        | 0.69        |
|     | Pharyngolaryngeal pain                                 | Mo           | 7          | (0.22)        | 1         | (0.1)         | 8          | (0.19)        | 0.47        |
|     | Pharyngolaryngeal pain                                 | S            | 1          | (0.03)        | 0         | (0)           | 1          | (0.02)        | 0.58        |
|     | Hiccups                                                | Mi           | 1          | (0.03)        | 0         | (0)           | 1          | (0.02)        | 0.58        |
|     | Allergic rhinitis                                      | Mo           | 1          | (0.03)        | 0         | (0)           | 1          | (0.02)        | 0.58        |
|     | Rhinorrhea                                             | Mi           | 61         | (1.95)        | 14        | (1.49)        | 75         | (1.84)        | 0.36        |
|     | Rhinorrhea                                             | Mo           | 15         | (0.48)        | 1         | (0.1)         | 16         | (0.39)        | 0.10        |

| SOC                       | PT                  | Severity     | AVX      | %             | AZ       | %            | Total    | %             | p-Value     |
|---------------------------|---------------------|--------------|----------|---------------|----------|--------------|----------|---------------|-------------|
|                           | Rhinorrhea          | S            | 1        | (0.03)        | 0        | (0)          | 1        | (0.02)        | 0.58        |
|                           | Cough               | Mi           | 17       | (0.54)        | 7        | (0.74)       | 24       | (0.59)        | 0.47        |
|                           | Cough               | Mo           | 6        | (0.19)        | 1        | (0.1)        | 7        | (0.17)        | 0.58        |
|                           | Cough               | S            | 1        | (0.03)        | 0        | (0)          | 1        | (0.02)        | 0.58        |
|                           | Productive cough    | Mi           | 1        | (0.03)        | 0        | (0)          | 1        | (0.02)        | 0.58        |
| <b>Vascular disorders</b> |                     | <b>Total</b> | <b>5</b> | <b>(0.16)</b> | <b>1</b> | <b>(0.1)</b> | <b>6</b> | <b>(0.14)</b> | <b>0.70</b> |
|                           |                     | <b>Mi</b>    | <b>4</b> | <b>(0.12)</b> | <b>1</b> | <b>(0.1)</b> | <b>5</b> | <b>(0.12)</b> | <b>0.87</b> |
|                           |                     | <b>Mo</b>    | <b>1</b> | <b>(0.03)</b> | <b>0</b> | <b>(0)</b>   | <b>1</b> | <b>(0.02)</b> | <b>0.58</b> |
|                           |                     | <b>S</b>     | <b>0</b> | <b>(0)</b>    | <b>0</b> | <b>(0)</b>   | <b>0</b> | <b>(0)</b>    |             |
|                           | Flushing            | Mi           | 2        | (0.06)        | 1        | (0.1)        | 3        | (0.07)        | 0.67        |
|                           | Flushing            | Mo           | 1        | (0.03)        | 0        | (0)          | 1        | (0.02)        | 0.58        |
|                           | Hypertensive crisis | Mi           | 1        | (0.03)        | 0        | (0)          | 1        | (0.02)        | 0.58        |
|                           | Hypertension        | Mi           | 1        | (0.03)        | 0        | (0)          | 1        | (0.02)        | 0.58        |

SOC: System Organ Class; PT: Preferred term; AE: Adverse Event; Mi: Mild; Mo: Moderate; S: Severe; AVX: AVX/COVID-12; AZ: AZ/ChAdOx-1-S. P-value calculated from comparison of proportions (Z-test).

**Supplementary Table 3.** Percentage of total, CD4<sup>+</sup> and CD8<sup>+</sup> T cells producing IFN- $\gamma$  in response to fraction 1 of spike protein stimulation

| Vacuna  | AVX/COVID-12                         |               |               |               | AZ/ChAdOx-1-S |               |               |               |         |
|---------|--------------------------------------|---------------|---------------|---------------|---------------|---------------|---------------|---------------|---------|
|         | Medición                             | Basal         | Day 14        | Day 90        | Day 180       | Basal         | Day 14        | Day 90        | Day 180 |
| Sujetos | 53                                   | 53            | 44            | 34            | 50            | 50            | 40            | 33            |         |
|         | <b>T Lymphocytes</b>                 |               |               |               |               |               |               |               |         |
| Mediana | 0.082                                | 0.076         | 0.079         | 0.05 *        | 0.087         | 0.098         | 0.071         | 0.036 *       |         |
| RIQ     | 0.059 - 0.134                        | 0.059 - 0.152 | 0.059 - 0.107 | 0.027 - 0.083 | 0.066 - 0.129 | 0.07 - 0.144  | 0.049 - 0.093 | 0.021 - 0.077 |         |
|         | <b>CD4<sup>+</sup> T Lymphocytes</b> |               |               |               |               |               |               |               |         |
| Mediana | 0.041                                | 0.051         | 0.045         | 0.034         | 0.05          | 0.05          | 0.041         | 0.0319 *      |         |
| RIQ     | 0.028 - 0.075                        | 0.035 - 0.087 | 0.029 - 0.062 | 0.021 - 0.084 | 0.027 - 0.079 | 0.033 - 0.075 | 0.028 - 0.072 | 0.021 - 0.045 |         |
|         | <b>CD8<sup>+</sup> T Lymphocytes</b> |               |               |               |               |               |               |               |         |
| Mediana | 0.015                                | 0.019         | 0.017         | 0.017         | 0.013         | 0.021 *       | 0.016         | 0.014         |         |
| RIQ     | 0.008 - 0.026                        | 0.011 - 0.033 | 0.011 - 0.033 | 0.009 - 0.022 | 0.006 - 0.033 | 0.01 - 0.057  | 0.009 - 0.03  | 0.006 - 0.023 |         |

IQR: Interquartile range p25-p75. p-values: \* $\leq$  0.05 for intra-group comparisons using the Wilcoxon signed-rank test.

\* Statistically significant increase compared to baseline values, \* Statistically significant decrease compared to baseline values.
